1     **Replication stress and FOXM1 drive radiation induced genomic instability and cell**  
2                                                             **transformation**

3

4                     Zhentian Li<sup>1</sup>, David S. Yu<sup>1</sup>, Paul W. Doetsch<sup>2</sup> and Erica Werner<sup>3\*</sup>

5

6     <sup>1</sup> Department of Radiation Oncology, Winship Cancer Institute, Emory University School of  
7     Medicine, Atlanta, Georgia, United States of America.

8     <sup>2</sup> Laboratory of Genomic Integrity and Structural Biology, NIH, National Institute of  
9     Environmental Health Sciences, Research Triangle Park, North Carolina, United States of  
10     America.

11     <sup>3</sup> Department of Cell Biology, Emory University School of Medicine, Atlanta, Georgia, United  
12     States of America.

13

14

15

16     Running title: radiation induces replication stress and FOXM1

17     Key words: Ionizing radiation, genomic instability, replication stress, DDR, FOXM1,  
18     micronucleus, homologous recombination.

19     \*Corresponding author:

20     Emory University School of Medicine

21     Department of Cell Biology

22     Whitehead Research Building 4<sup>rd</sup> floor /Room 455

23     615 Michael Street Atlanta, GA 30322 USA

24     Tel.: (404)-727-3945 Email: ewerner@emory.edu

1 **ABSTRACT**

2

3 In contrast to the vast majority of research that has focused on the immediate effects of  
4 ionizing radiation, this work concentrates on the molecular mechanism driving delayed  
5 effects that emerge in the progeny of the exposed cells. We employed functional protein  
6 arrays to identify molecular changes induced in a human bronchial epithelial cell line  
7 (HBEC3-KT) and osteosarcoma cell line (U2OS) and evaluated their impact on outcomes  
8 associated with radiation induced genomic instability (RIGI) at day 5 and 7 post-exposure  
9 to a 2Gy X-ray dose, which revealed replication stress in the context of increased  
10 FOXM1 expression. Irradiated cells had reduced DNA replication rate detected by the  
11 DNA fiber assay and increased DNA resection detected by RPA foci and  
12 phosphorylation. Irradiated cells increased utilization of homologous recombination-  
13 dependent repair detected by a gene conversion assay and DNA damage at mitosis  
14 reflected by RPA positive chromosomal bridges, micronuclei formation and 53BP1  
15 positive bodies in G1, all known outcomes of replication stress. Interference with the  
16 function of FOXM1, a transcription factor widely expressed in cancer, employing an  
17 aptamer, decreased radiation-induced micronuclei formation and cell transformation  
18 while plasmid-driven overexpression of FOXM1b was sufficient to induce replication  
19 stress, micronuclei formation and cell transformation.

20

21

22

23

## 1 INTRODUCTION

2 Ionizing radiation is an effective and widely used tool for cancer treatment and  
3 control. Over 50% of cancer patients will be exposed to ionizing radiation at some point  
4 of their illness (1). Therefore, because of radiation's wide use and improved cancer  
5 treatment outcomes, adverse effects such as malignancies secondary to radiation are  
6 becoming more concerning (2, 3). The mechanism for radiogenic cancers is unknown.  
7 All tissues are susceptible to develop radiation-induced tumors of low mutational load,  
8 without a unique signature resulting from a known mechanism (4, 5). Ionizing radiation  
9 is considered a weak mutagen (2, 6), and generates multiple types of lesions on DNA (7).  
10 Among them, double strand breaks (DSB) are the most toxic, however can be readily  
11 repaired in normal cells or cause death or senescence in repair-impaired cells (8).

12 Ionizing radiation also generates responses in cells that have not been directly  
13 targeted, which include delayed genomic instability, bystander, clastogenic and  
14 transgenerational effects (reviewed in (9, 10)). The molecular mechanisms driving these  
15 responses and their impact on the overall effects of ionizing radiation remain poorly  
16 understood.

17 Among non-targeted effects, radiation induced genomic instability (RIGI) is a  
18 quite heterogeneous response defined by the increased rate of acquisition of *de novo*  
19 genomic alterations in the progeny of irradiated cells (11). A diverse set of biological  
20 end points have been associated with genomic instability, including micronuclei  
21 formation, sister chromatid exchanges, chromosomal gaps, karyotypic abnormalities,  
22 microsatellite instability, homologous recombination, gene mutation and amplification,  
23 cellular transformation, clonal heterogeneity and delayed reproductive cell death (11).

1 RIGI can be detected following exposure to moderate doses of X-rays in multiple cell  
2 lines *in vitro* and in tissues of animals irradiated *in vivo* (9).

3 Genomic instability is present in the majority of cancers, driving tumor  
4 development and evolution. During tumor initiation, genomic instability has been  
5 proposed to accelerate the acquisition of mutations. There is evidence supporting the role  
6 of genomic instability as a first step in the genesis of certain radiation-induced cancers *in*  
7 *vivo* (6, 12). Thus, RIGI can be considered as a model to study inducible genomic  
8 instability and as a mechanism contributing to radiation-induced carcinogenesis (9).

9 Several factors have been shown to modulate RIGI. Oxidative stress associated  
10 with mitochondrial malfunction promotes a genomic instability state, as interference with  
11 reactive oxygen species generation or scavenging attenuates readouts (13). Other factors  
12 that have been shown to influence RIGI are epigenetic changes and deficiencies in DNA  
13 repair (14) (15). However, no unifying molecular mechanism has been established for  
14 RIGI development yet.

15 In the current study we employ an immortalized, non-tumorigenic cell line of  
16 human bronchial epithelial cells HBEC3-KT, which have precursor properties as they can  
17 differentiate *in vitro* and can be progressed to further transformed states by oncogene  
18 expression or exposure to carcinogenic agents (16-18). The lung is an organ remarkably  
19 susceptible to low doses of radiation (2, 19) and it is at high risk for carcinogenesis  
20 secondary to radiation therapy (20). HBEC3-KT reproduce several of the attributes and  
21 end points associated with RIGI. Our previous work showed that exposure to high and  
22 low LET radiation induced transient genomic instability peaking at day 7 and decreasing  
23 by days 14 and 21 post-irradiation (21) (22). Phenotypes associated with genomic

IR induces replication stress

- 1 instability such as micronucleus formation and  $\gamma$ H2AX and 53BP1 foci are cell
- 2 autonomous at day 7. Micronucleus formation increases with dose, reaching saturation at
- 3 4Gy(23). For the experiments in this work, cells were exposed to a 2Gy dose representing
- 4 the average radiation dose per fraction received by patients during radiation therapy.
- 5 Employing protein arrays, we identify two potential mechanisms, replication stress and
- 6 FOXM1, and evaluate their role in promoting RIGI and cell transformation.

## 1   **RESULTS**

2           We have previously shown that radiation induces transient genomic instability in  
3   HBEC3-KT cells expressed as increased micronuclei formation, residual 53BP1 and  
4    $\gamma$ H2AX foci, in the context of cellular oxidative stress (21). To identify conserved  
5   mechanisms driving these phenotypes we leveraged RIGI development in two cell lines  
6   of different tissue origin, HBEC3-KT and the osteosarcoma epithelial cell line U2OS to  
7   exclude tissue specific mechanism. As shown in Fig. 1A, following exposure to a 2Gy  
8   X-ray dose, a three-fold increase in micronucleus formation can be detected at day 7 in  
9   HBEC3-KT and at day 5 in U2OS, timing that corresponds to about 4 population  
10   doublings. The micronucleus assay detects fragments or whole chromosomes that can not  
11   engage with the mitotic spindle as a result of damage to chromosomes or the mitotic  
12   machinery (reviewed by M. Fenech (24)). Consistent with damaged DNA at the moment  
13   of mitosis, we measured four and two-fold increased frequency of Replication Protein A  
14   (RPA) positive chromosomal bridges in the irradiated cell populations for HBEC3-KT  
15   and U2OS respectively, an indication of single stranded DNA generation during genomic  
16   material segregation (Fig. 1B). An additional reported consequence of DNA damage  
17   during mitosis is that 53BP1 bodies accumulate in the following G1 phase (25). Both cell  
18   types showed roughly a three-fold increased accumulation of 53BP1 bodies in cells in G1  
19   phase, identified by the absence of nuclear Cyclin A (Fig. 1C). RPA positive  
20   chromosomal bridges have been previously observed in cells that undergo mitosis in the  
21   presence of accumulated unresolved homologous recombination intermediaries (26, 27).  
22   To test whether the homologous recombination repair pathway is used at a higher  
23   frequency in irradiated cells, we utilized a panel of genetically engineered U2OS cell

1 lines with integrated GFP constructs to report the repair of a chromosomal DNA double  
2 strand break introduced by the endonuclease I-SceI by homologous recombination (HR),  
3 non-homologous end joining (c-NHEJ) and alternative non-homologous end joining (a-  
4 NHEJ) (Fig. 1D, Supplementary Fig.1)(28). Compared to non-irradiated cells, exposure  
5 to X-ray increased the number of GFP positive cells detected in the HR reporter line by  
6 2.5 fold while the relative number of cells detected decreased in the c-NHEJ reporter line  
7 without affecting a-NHEJ dependent repair. Increased HR is a previously described RIGI  
8 outcome (29). Altogether, these results suggest that several days following irradiation,  
9 replicating cells are undergoing mitosis with damaged DNA and relying more on the HR  
10 pathway to repair double strand breaks.

11 To gain further understanding of the mechanisms and scope of the alterations  
12 occurring in irradiated cells, we performed a functional proteomics analysis employing  
13 reverse phase protein arrays (RPPA) to assess the expression of 431 proteins including  
14 post-translational modifications relevant to cancer. Furthermore, this array is enriched in  
15 proteins involved in cell cycle regulation and HR. We analyzed the responses to a 2Gy  
16 dose X-ray at day 5 and 7 of HBEC3-KT cells and at day 5 for U2OS. Unsupervised  
17 hierarchical clustering of the results for HBEC3-KT show a clear segregation of the day 7  
18 samples from the non irradiated and day 5 post-irradiation samples (Supplementary Fig.  
19 2), which is consistent with our previous findings that the phenotype at day 7 is a  
20 response that emerges overtime after exposure and not residual response to initial  
21 damage(22). We reasoned that proteins and pathways that co-variate in both cell lines  
22 could be associated with common phenotypes induced by radiation exposure. A  
23 comparison between the proteins significantly differentially regulated in U2OS and

1 HBEC3-KT (Fig. 2A) reveals common up-regulation of phospho Aurora Kinase A and an  
2 increase in FOXM1 expression, a transcription factor that regulates the expression of  
3 multiple DNA repair proteins, increases HR dependent repair in the direct repeats  
4 conversion assay (30, 31) and cell cycle progression (32). Analysis focused on proteins  
5 involved in cell cycle regulation and HR is shown in Fig. 2B. The heat map exhibits an  
6 overall milder response for U2OS than HBEC3-KT cells, but both cell models display  
7 increased expression of markers related to end-resection (CtIP in U2OS and S4/S8 RPA  
8 phosphorylation in HBEC3-KT) in the context of small changes in levels and  
9 phosphorylation of proteins involved in checkpoint activation such as ATM, ATR, Chk1  
10 and Chk2. The interrogation also reveals upregulation of proteins promoting M phase  
11 entry reflected by increases in CDK1 and Wee1 phosphorylation with increased PLK1  
12 and Cdc25C, which are more prevalent in HBEC3-KT, but supported by a significant  
13 decrease in p21 expression in U2OS cells. In HBEC3-KT, RAD51 and Cyclin B, two  
14 targets for FOXM1 regulation, had increased expression at day 7. Collectively, these  
15 findings suggest the presence of a modest replication stress and checkpoint activation  
16 within the context of increased FOXM1 expression and activity.

17 To validate these findings, we measured DNA replication rate employing the  
18 DNA fiber assay. As shown in Fig. 3A, replication speed was significantly slower (all  
19 doses vs. non irradiated  $p < 0.0001$ , one way ANOVA) in cells that have been irradiated,  
20 reduced from 0.8 kb/min in non-irradiated cells to 0.61, 0.54 and 0.59 following doses of  
21 2, 4 or 6 Gy. As the radiation dose increases, a larger fraction of the replication tracks  
22 become shorter, but the assay did not detect pausing or stalling as all tracks incorporated  
23 both labeled nucleotides and no significant track labeling asymmetry was detected



1 (Supplementary Fig. 3A) (33). As a reference, we measured a replication rate of 0.26  
2 kb/min in cells treated with 25 $\mu$ M hydroxyurea for 24h. This low dose has been reported  
3 to cause replication stress by reducing the availability of nucleotides following inhibition  
4 of ribonucleotide reductase (34). Reduced replication speed leads to increased single  
5 stranded DNA accumulation, which binds RPA and commits damage repair by HR. This  
6 prediction was examined by immunofluorescence to detect RPA associated with  
7 chromatin, which revealed that exposure to radiation increased by three-fold the  
8 percentage of cells with RPA foci in HBEC3-KT at day 7 and in U2OS at day 5 (Fig.  
9 3B). These results are consistent with increased RPA phosphorylation detected by RPPA  
10 (Fig. 2B). Reduced availability of nucleotides is a mechanism leading to replication stress  
11 frequently found in cancer and can be reversed by nucleoside supplementation (35).  
12 However, addition of nucleosides to the cultures in conditions that reduced micronucleus  
13 formation induced by HU was not effective in reducing radiation-induced effects  
14 (Supplementary Fig. 3B). FOXM1 is one of the proteins significantly elevated at day 7  
15 but not at day 5 post-irradiation in HBEC3-KT cells and increased in U2OS cells as well  
16 (Fig. 3C), which we confirmed by western blot in lysates from both cell lines (Fig. 3D).  
17 Interestingly, FOXM1 expression as well as RAD51 and EXO1, two genes that have  
18 been reported to be transcriptional targets for FOXM1 (36, 37) also increased in HBEC3-  
19 KT at day 7. U2OS cells have a higher basal FOXM1 expression, which was increased by  
20 radiation, but the up-regulation of the transcriptional targets measured was less robust  
21 than in HBEC3-KT cells.

22         Given the significant impact that FOXM1 expression has on the expression of  
23 DNA repair proteins and on carcinogenesis, we tested whether it is contributing to the

1 genomic instability phenotypes in irradiated cells employing an aptamer oligonucleotide  
2 that was selected to interfere with transcriptional activity of FOXM1 (Aptamer) and  
3 compared to an oligomer of random sequence (Control) (38) instead of FOXM1  
4 knockdown, because it has been shown that reduction in FOXM1 protein disrupts mitosis  
5 and causes DNA damage (39, 40). The FOXM1-specific aptamer reduced the radiation-  
6 induced upregulation of EXO1, Cyclin B and RAD51 when delivered by transfection to  
7 HBEC3-KT cells (Fig. 4A) without increasing micronucleus ( Figs. 4B, 6B) or HR ( Fig.  
8 4C) in non-irradiated cells. The aptamer significantly reduced micronucleus formation  
9 rates in irradiated HBEC3-KT cells by 50% (Fig. 4B), and reduced the number of GFP-  
10 positive cells resulting from homology-dependent repair in both irradiated and non-  
11 irradiated U2OS cells (Fig. 4C). Taken together, these results suggest a role for FOXM1  
12 in promoting RIGI in both cell types.

13 We tested next, whether FOXM1 overexpression is sufficient to induce some of  
14 the radiation-induced phenotypes. To increase FOXM1 expression levels we employed a  
15 cDNA construct regulated by Doxocyclin (Fig. 5A), which in U2OS cells increased the  
16 expression of EXO1 and RAD51 under our cell culture conditions even without  
17 Doxocyclin addition. FOXM1 overexpression, but not empty vector, was sufficient to  
18 induce micronucleus formation in HBEC3-KT and U2OS (Fig. 5B). FOXM1  
19 overexpression, was sufficient to induce RPA phosphorylation in Serines 4 and 8, similar  
20 to the induction produced by a 48h treatment with 25 $\mu$ M HU or a 4h treatment with 3mM  
21 HU, conditions that induce mild and high replication stress, respectively (Fig. 5C),  
22 consistent with previous reports (34). FOXM1 overexpression also induced mild  
23 increases in CHK1 phosphorylation, which is an indicator of checkpoint activation

1 occurring as a response to disruptions in S phase. Collectively, these results indicate that  
2 FOXM1 expression alone induces replication stress as indicated by RPA and CHK1  
3 phosphorylation and defects during mitosis measured by the micronucleus assay,  
4 reproducing some of the phenotypes induced by radiation.

5 The RPPA platform has been widely employed to analyze cell lines and tumor  
6 samples in the TCGA database and the results have been compiled in searchable  
7 databases (41, 42). We asked next, how general is the correlation between FOXM1  
8 expression and markers for replication stress (pS345 Chk1 and/or pS428 ATR) and  
9 FOXM1 transcriptional targets Cyclin B and RAD51 in cancer cell lines and tumor  
10 samples. A survey of the databases revealed that the cell lines derived from multiple  
11 cancer types show a significant ( $p < 0.05$ ) positive correlation of FOXM1 with Cyclin B  
12 and/or RAD51 expression suggesting FOXM1 activity, which did not necessarily  
13 correlate with average FOXM1 expression levels of each cancer type category (Fig. S4A,  
14 B). The cell lines of 3 cancer types had a strong ( $R > 0.66$ ) and another 3 had a moderate  
15 ( $0.65 > R > 0.35$ ) positive correlation between FOXM1 expression and a marker for  
16 replication stress. A significant positive correlation, although moderate ( $0.65 > R > 0.35$ )  
17 between FOXM1 and pS345 Chk1, is observed in tumor samples from liver, ovarian,  
18 cervical and testicular cancer (Supplementary Fig. 5B). In tumor samples, liver, cervical  
19 and testicular tumors had higher levels of FOXM1 (Supplementary Fig. 5A). These  
20 observations suggest that this is a mechanism highly represented in cancer lines and in a  
21 wide range of tumor types.

22 Given that our results show that radiation and FOXM1 induce replication stress, a  
23 known driver of cancer initiation and progression, we tested next whether exposure to

1 radiation promotes cell transformation in HBEC3-KT and involves FOXM1 in this  
2 process. HBEC3-KT cells are immortalized but not transformed (16). However,  
3 transformation and progression towards malignancy can be induced by exposure to  
4 carcinogens such as radiation, and cigarette smoke condensate (43, 44) and by expression  
5 of several oncogenes (45). As an intermediate step in transformation and progression,  
6 HBEC3-KT cells acquire the capability to form colonies in soft agar, which measures  
7 anchorage independent growth. Cell cultures were irradiated in triplicate with a 4 Gy  
8 dose to increase the sensitivity of the assay by inducing a greater response measured by  
9 reduced DNA replication (Fig. 3A) and higher levels of micronuclei formation (Fig 6A)  
10 and (23). At day 7, the effects of the different treatments were evaluated by  
11 micronucleus formation shown in Fig. 6A. At 4 weeks of continuous growth, the cells  
12 were evaluated for the capability to grow in soft agar. Exposure to radiation significantly  
13 increased the number of colonies in mock and in control aptamer transfected cells.  
14 Transient interference with FOXM1 activity at the time of genomic instability by the  
15 aptamer, reduced the radiation response, demonstrating a role for both, RIGI and FOXM1  
16 activity on cell transformation events. All together these results suggest that low levels of  
17 FOXM1 activity, such as the ones induced by radiation exposure, are sufficient to  
18 promote cell transformation.

19

20

21

22

23

## 1 **DISCUSSION**

2           In this work we have uncovered two mechanisms, replication stress and FOXM1  
3 expression, driving RIGI following exposure to X-rays. We employed functional  
4 proteomics to evaluate the expression of a selected number of proteins in two cell lines,  
5 HBEC3-KT and U2OS, exhibiting RIGI at days 7 and 5 post-irradiation respectively. The  
6 signature of changes detected indicated the presence of replication stress and implicated  
7 FOXM1 as a candidate molecule to promote RIGI. These predictions were confirmed by  
8 measuring slower DNA replication rates with the DNA fiber assay and accumulation of  
9 ssDNA in irradiated cells as well as by modifying RIGI outcomes by altering FOXM1  
10 activity. Furthermore, employing these tools to interfere with delayed genomic  
11 instability, we demonstrate a contribution of RIGI to radiation-induced cell  
12 transformation of HBRC3-KT cells *in vitro*.

13           One of our most significant finding is replication stress in cells undergoing RIGI,  
14 which mechanistically may explain several of the outcomes associated with RIGI  
15 measured in previous studies and add novel outcomes to further describe this non-  
16 targeted effect. Employing the DNA fiber assay, we detected lower replication elongation  
17 rates in irradiated cells, slowing down as the dose of the initial exposure increases (Fig.  
18 3A). Reduced processivity of the replication machinery is known to be sufficient to cause  
19 uncoupling with replicative helicases, exposing RPA-binding ssDNA(46), which we  
20 detected as increased RPA-positive foci (Fig. 3B). HR (Fig. 1D) is activated as a  
21 tolerance mechanism to repair DNA DSBs that are more prone to occur and to stabilize  
22 and repair replication forks (47) and is a RIGI outcome following low and high LET  
23 radiation exposures (29). An additional consequence of reduced replication speed is the

1 incomplete replication of the genome, particularly in late replicating regions rich in  
2 chromosomal fragile sites or of low density in replication origins (48). Non-replicated  
3 regions result in nondisjunction of sister chromatids during mitosis, which leads to the  
4 formation of anaphase bridges (49), often exposing ssDNA, which we detected as RPA-  
5 positive bridges (Fig. 1B). RPA positive chromosomal bridges, associated with  
6 chromosomal aberrations, are observed when replication stress is induced in cancer cells  
7 (35). DNA damaged during mitosis, is protected by 53BP1 binding until repair during the  
8 following phase of the cell cycle (25), which we measured in irradiated cultures as an  
9 increased frequency of 53BP1 bodies in Cyclin A-negative cells (Fig. 1C). A screen to  
10 identify factors contributing to the formation of 53BP1 bodies found that the most  
11 effective condition was a low aphidicolin dose, sufficient to impair replication fork  
12 progression through physiological barriers (48), supporting the notion that a reduction in  
13 replication elongation rate such as the observed in our work, would be sufficient to  
14 induce all these RIGI phenotypes (25). Replication stress could also explain additional  
15 RIGI outcomes previously described in the literature but not investigated in this work:  
16 Slow or arrested replication forks stimulate the use of potentially mutagenic DNA repair  
17 pathways that can lead to the accumulation of mutations and to chromosomal  
18 rearrangements (reviewed by Gaillard et. al (46)). Replication stress induces DSB  
19 formation and ssDNA gaps which lead to chromosomal fragility and gap formation at  
20 metaphase (35). Increased HR activity is associated with increased sister-chromatid  
21 exchanges and recombination events (reviewed in references (50-52)).

22 The main causes for replication stress have been attributed to the reduced  
23 availability of resources required for replication, including nucleotides or histones as well

1 as structural impediments in the DNA, such as damage, bound proteins or DNA  
2 secondary structures (53). We examined whether a deficiency in the nucleotide pool was  
3 a factor, which is a common mechanism leading to replication stress in oncogene-driven  
4 cancer (35), however increasing the availability of nucleotides had no effect  
5 (Supplementary Fig. 3B). Another factor affecting replication rate could be chronic  
6 oxidative stress, which we have previously shown to be present in HBEC3-KT at day 7-  
7 post irradiation (21). Chronic oxidative stress has been shown to slow replication in HR  
8 defective cells, however this deficiency can be suppressed by supplying nucleotide  
9 precursors (54). Low levels of ROS have been shown to induce the dissociation of the  
10 component of the replication protection complex Timeless, from the replisome causing  
11 fork slowdown (55) and the modification of several other factors involved in replication  
12 (53). However, our previous characterization of the oxidative stress response in these  
13 cells indicates that oxidative stress is a permissive factor for genomic instability engaged  
14 at low dose, while many of the genomic instability readouts show dose dependency  
15 pointing to an additional determinant factor (21, 23).

16 We identified FOXM1 as a second factor modulating RIGI outcomes. FOXM1 is  
17 a transcription factor widely expressed in pre-malignant lesions and cancer, and is  
18 included in a chromosomal instability signature correlating with functional aneuploidy  
19 and highly predictive for clinical outcomes (56, 57). Our findings are consistent with  
20 FOXM1 activity promoting genomic instability. We show that radiation increased  
21 FOXM1 expression with dose at day 7 post-exposure (Fig. 3C,D) and that FOXM1  
22 overexpression is sufficient to induce RPA and Chk1 phosphorylation (Fig. 5C),  
23 considered as the most specific indicators for replication stress (58, 59). While the

1 induced phosphorylation levels were small, they were comparable to low doses of HU,  
2 which we show reduced replication rate and increased micronucleus formation  
3 (Supplementary Fig. 3B). Low doses of aphidicolin or HU are sufficient to reduce  
4 replication speed without significant ATR and Chk1 activation (34, 60) have been also  
5 shown to induce 53BP1bodies optimally (25) and expression of CFS (48). Replication  
6 stress would offer a mechanism to explain reported FOXM1 dependent increases in LOH,  
7 and CNV (61, 62), which have been also identified as RIGI outcomes. Interference with  
8 FOXM1 transcriptional activity reduced radiation-induced micronucleus formation and  
9 increased HR dependent repair, while overexpression was sufficient to induce  
10 micronuclei formation (Figs. 4 and 5).

11 FOXM1 controls the expression of multiple genes involved in DNA homeostasis  
12 including NBS, BRIP1, XRCC1, BRCA2, EXO1, RAD51 and RRM2 as well as cell  
13 cycle regulation, Cyclin B and PLK1 ((30, 31, 36, 37, 40, 63, 64) and reviewed in (32)).  
14 Several of these targets could mediate FOXM1 role during RIGI. Overexpression of  
15 RAD51 increases HR activity and chromosomal instability (65-67), and overexpressed  
16 EXO1 promotes end resection (68). An alternative mechanism could be by promotion of  
17 premature entry into mitosis by inducing the expression of Cyclin B and PLK1 (39).  
18 Given these pleiotropic effects, further experiments beyond the scope of this work, are  
19 needed to identify the transcriptional target of FOXM1 promoting RIGI.

20 We show evidence supporting a role for FOXM1 in radiation-induced cell  
21 transformation as transient interference with FOXM1 transcriptional activity was  
22 sufficient to dampen cell growth in soft agar induced by IR (Fig. 6B). This activity is  
23 consistent with transgenic mice models showing that FOXM1 expression promotes early



1 steps in tumorigenesis, promoting Clara cell and hepatocyte hyperplasia for example (69,  
2 70) and acting in conjunction with many other carcinogens (71) as well as cancer cell  
3 lines (72, 73). Replication stress has been shown to be a source for genomic instability in  
4 pre-neoplastic lesions, while in normal cells replication stress leads to cell death or  
5 senescence through activation of DDR (74-76). FOXM1 expression could be a tolerance  
6 mechanism to evade anti-proliferative signals, such as oncogene-induced differentiation  
7 (77), DNA damage-induced senescence (31) and aging (78), and allow the proliferation  
8 of genomically unstable cells. Thus, we propose that FOXM1 expression is enabling  
9 radiation induced cell transformation.

10 In summary, we show that HBEC3-KT is a model system to elucidate  
11 mechanisms driving RIGI, as it reproduces many of the outcomes for RIGI reported in  
12 other model systems. Moreover, by transient interference with FOXM1 activity, we  
13 demonstrate that the observed transient increase in genomic instability contributes to  
14 radiation-induced cell transformation and is thus a potential target of intervention to  
15 mitigate late emerging deleterious effects of radiation exposure.

16

1 **ACKNOWLEDGMENTS**

2 We thank Kathryn Aziz for coordinating sample analysis at the MD Anderson RPPA  
3 core, funded by NCI#CA16672. Flow cytometry was performed in the  
4 Emory +Pediatric's/Winship Flow Cytometry Core.

5

6 **FUNDING**

7 This work was funded by DoD grant W81XWH-17-1-0187 to PWD/EW and supported  
8 by US National Institute of Health Intramural Research Program Projects: Z1AES103328  
9 to PWD.

10

11

12 **COMPETING INTEREST**

13 The authors declare no competing interests.

14

15 **AUTHOR CONTRIBUTIONS**

16 Conceptualization E.W.; Investigation, Z.L., E.W.; Resources: D.S.Y.; Writing – Original  
17 Draft, Z.L., E.W.; Writing – Review and Editing, Z.L., E.W., D.S.Y, P.W.D.; Funding  
18 Acquisition, E.W. and P.W.D.

19

20 **ABBREVIATIONS**

21 IR: ionizing radiation, LET: Linear Energy Transfer, LOH: loss of heterozygosity, CNV:  
22 copy number variation, ssDNA: single stranded DNA, dsDNA: double stranded DNA,  
23 CFS: chromosomal fragile site.

## 1 **MATERIALS AND METHODS**

### 2 **Cell lines, reagents and irradiations**

3 The human bronchial epithelial cell line (HBEC3-KT) was a gift from Dr. Story (UT  
4 Southwestern), was authenticated by karyotyping and tested for mycoplasma at the  
5 moment of stock preparation. Cells were cultured in Keratinocyte serum free media  
6 (Invitrogen) supplemented with antibiotics, Epidermal growth Factor and Bovine  
7 Pituitary extract. HBEC3-KT cells were transfected with Fugene HD or Lipofectamine  
8 3000. FOXM1 and control aptamers were custom synthesized by Sigma with thio-  
9 modification, prepared and used at a 100nM concentration as described in (38). DRG,  
10 EJ5 and EJ2-U2OS cells were a gift from Dr. Jeremy Stark (Beckman Research Institute  
11 of the City of Hope). pCW57.1-FOXM1b was a gift from Adam Karpf (Addgene plasmid  
12 # 68811), pRRL sEF1a HA.NLS.Sce (opt).T2A.IFP was a gift from Andrew Scharenberg  
13 (Addgene plasmid # 31484).

14 Low-LET irradiation was carried out using an X-ray machine (X-RAD320, Precision X-  
15 Ray, N. Branford, CT, USA) at 320kV, 10mA. Irradiation was delivered at room  
16 temperature as a single dose or multiple fractions of 320 kV X-rays (Precision X-Ray  
17 Inc., North Branford, CT, USA), at dose-rate approximately 2.3 Gy/min. For irradiations,  
18 200 000 cells were plated in a T25 flask two days before irradiation in triplicates to  
19 ensure continuous proliferation before and after exposure. At day 4, each flask was  
20 subcultured at a 1:3 ratio.

### 21 **DNA Repair reporter assay**

22 DRG, EJ5 and EJ2 U2OS reporter cell lines, a gift from Dr. Jeremy Stark, were grown in  
23 DMEM 10% FBS. At day 3 after irradiation, 500 000 cells were transfected with I-SceI

1 IFP in triplicate. At day 6, all cells were incubated with 25 $\mu$ M biliverdin, and 18h later  
2 the cells were collected to measure expression of GFP and IFP (for transfection  
3 efficiency normalization) by flow cytometry in a FACS LSRII Instrument (BD  
4 Biosciences). The data collected was analyzed using FlowJo software as described (79).  
5 Control and FOXM1 aptamer were transfected at 100nM at day 2 after irradiation.

#### 6 **Micronucleus assay**

7 Cells were plated at a density of 20 000/well on glass coverslips and treated for 18h with  
8 3  $\mu$ g/ml Cytochalasin B in media to block cytokinesis before fixing with 4% PFA and  
9 staining with DAPI. Binucleated cells, which are the cells that underwent mitosis during  
10 the cytochalasin incubation period, were scored for the presence of micronuclei and/or  
11 nuclear blebs as previously described (21).

#### 12 **Reverse Phase Protein Array**

13 Cell lysates were prepared from three biological replicates in 50mM HEPES pH7.4, 1%  
14 Triton X-100, 150mM NaCl, 1.5mM MgCl<sub>2</sub>, 1mM EGTA, 10% Glycerol containing anti  
15 proteases and anti phosphatases (Roche) and sent for analysis at the Reverse Phase  
16 Protein Array Core Facility at MD Anderson. Relative protein levels are obtained by  
17 interpolating several sample dilutions into a standard curve and then normalized for  
18 protein loading. The scatter plot was generated by graphing the difference between  
19 irradiated and non-irradiated averages of triplicate samples normalized and transformed  
20 to linear values. Included are only the proteins that yielded a significant difference  
21 (paired t-test, p<0.05) in HBEC3-KT and/or U2OS cell lysates. Heat maps were  
22 generated with normalized log<sub>2</sub> median centered data for each marker employing  
23 Morpheus software (Broad Institute).

## 1 **DNA Fiber assay**

2 Cells were pulsed with 25 $\mu$ M IdU and then with 250 $\mu$ M CldU for 30 minutes each at  
3 37°C then released with trypsin and spotted on glass slides. DNA was spread following a  
4 7min lysis with 0.5% SDS, 200 mM Tris-HCl pH 7.4, 50 mM EDTA. Dried slides were  
5 fixed with a (3:1) Methanol/Acetic acid mixture and denatured for 60min in 2.5 N HCl.  
6 Following 1h blocking in 15%FBS in PBS, the slides were incubated in primary  
7 antibodies for 2h 1:400 rat anti-bromodeoxyuridine (ab6326 Abcam) and 1:50 mouse  
8 anti- bromodeoxyuridine (B44, BD). After a stringency wash with 10 mM Tris-HCl pH  
9 7.4, 400 mM NaCl, 0.2% Nonidet P40 (NP40), the slides were incubated with Alexafluor  
10 conjugated secondary antibodies: 488-conjugated chicken anti-rat, 488-conjugated goat  
11 anti-chicken, 594-conjugated rabbit anti-mouse and 594-conjugated goat anti-rabbit in  
12 1:300 dilution. The slides were mounted in Fluoromount-G (Southern Biotech). Images  
13 of the fibers were acquired with a 63x oil immersion objective on a Zeiss Observer Z1  
14 microscope equipped with Axiovision 4.8 software. 200 dual color labeled replication  
15 track length was measured employing Fiji Software and were converted to replication  
16 speed using conversion factor is 2.59kb/ $\mu$ m (80, 81). Statistical significance between  
17 groups was assessed using One Way ANOVA with a Bonferroni all pairs comparison  
18 post- test.

## 19 **Immunofluorescence**

20 RPA foci and anaphase bridges were detected in cells fixed with 4% paraformaldehyde  
21 and permeabilized with 0.2% TritonX-100. For RPA foci, cells were pre-extracted with  
22 0.5% TritonX-100 before fixing. Antibodies used were RPA70 (Millipore), 53BP1  
23 (Novus Biologicals), Cyclin A (Santa Cruz). The slides were mounted in Fluoromount-G

1 (Southern Biotech). Images were acquired with a 63x oil immersion objective on a Zeiss  
2 Observer Z1 microscope equipped with Axiovision 4.8 software. Images were processed  
3 using contrast/brightness enhancement only. Foci were counted in at least 5 different  
4 fields totaling 50 or more cells in duplicate irradiations.

#### 5 **Western Blot analysis**

6 Cell lysates were preparing employing RIPA buffer (50mM Tris pH=7.4, 150mM NaCl,  
7 2mM EDTA, 0.5% NP40, 0.25% Sodium Deoxycholate) supplemented with Complete  
8 protease inhibitor and PHOSStop phosphatase inhibitor (Roche). Hundred micrograms of  
9 protein were separated in 10% SDS PAGE and transferred to a PVDF membrane. The  
10 membrane was probed with antibodies for FOXM1, Cyclin B, CHK1 S345, (CST),  
11 Rad51, Exo1 (Abcam), RPA2 s4/s8 (Bethyl), GAPDH (GeneTex), tubulin (T6074,  
12 Sigma). Bound antibodies were detected with infrared fluorescent secondary antibodies  
13 and imaged with a LI-COR Odyssey system. The numbers below the bands are fold of  
14 change over the non-treated condition calculated from the relative intensity of the bands  
15 quantified employing Image Studio Software.

#### 16 **Growth in soft agar**

17 HBEC3-KT cells were irradiated in triplicate flasks and transfected at day 4 with the  
18 indicated DNA. At day 6, samples were collected to analyze for micronucleus formation.  
19 Cells were continuously passaged for 3 weeks. At week 4 media was changed to a 1:1  
20 mixture of complete Keratinocyte Serum Free media and 10% FBS RPMI to  
21 accommodate potential metabolic changes and promote clone growth (82). At the end of  
22 week 4, 50 000 cells per well were plated in 0.37% agar in triplicate wells over a 0.7%  
23 agar bottom layer. Colonies of a diameter larger than 10 cells were counted after 3 weeks.

1

2 **Statistical analysis**

3 The statistical test applied in each case is stated in the figure legend. Excel was used for  
4 two-tailed Student's t-test analysis assuming equal variance of the samples. Kaleidagraph  
5 (Synergy Software) was used for One Way ANOVA employing a Bonferroni or Fisher's  
6 LSD post-hoc test as indicated in the figure legend. Statistical significance is represented  
7 by asterisks: \*=  $p \leq 0.05$ ; \*\*=  $p \leq 0.01$ ; \*\*\*=  $p \leq 0.005$ ; \*\*\*\*=  $p \leq 0.001$ .

8

9

10

1 **Figure Legends**

2 **Figure 1:** X-ray irradiated cells have damaged DNA at mitosis and increased usage of the  
3 HR pathway.

4 A) Micronucleus formation rates at day 7 (HBEC3-KT) or day 5 (U2OS) following  
5 exposure to 2Gy X-ray. Average of 2 experiments, error bars represent SEM.

6 Student's t-test. Inserts depict a representative image of binucleated HBEC3-KT  
7 cells with a micronucleus or a nuclear bud, respectively.

8 B) Increased frequency of RPA-positive chromosomal bridges in irradiated cells.

9 Proliferating cultures of day 7 (HBEC3-KT) or day 5 (U2OS) following exposure  
10 to 2Gy X-ray were fixed and stained for RPA 70. An average of 90 mitosis per  
11 condition were scored for RPA positive bridges. Error bars represent standard  
12 deviation of triplicate samples. Student's t-test. Insert depicts a representative  
13 image of RPA-positive chromosomal bridge in U2OS (left panel) and HBEC3-KT  
14 (right panel) cells.

15 C) Frequency of nuclei with more than three 53BP1-positive foci per nuclei scored in  
16 an average of 100 Cyclin A negative nuclei per sample in HBEC3-KT at day 7  
17 and in U2OS cells at day 5 following a 2Gy X-ray dose. Error bars represent  
18 standard deviation of triplicate samples. Student's t-test. Insert depicts HBEC3-  
19 KT cells with Cyclin A positive nuclei without 53BP1 bodies and Cyclin A  
20 negative nuclei with 53BP1 bodies.

21 D) Relative GFP induction levels in U2OS reporter cell lines for homologous  
22 recombination dependent repair (DRG), cNHEJ (EJ2) and aNHEJ (EJ5) at day 7



1 following exposure to a 2Gy X-ray dose. Average of 2 experiments, error bars  
2 represent SEM.

3

4 **Figure 2:** Reverse Phase Protein Array analysis of proteins and post-translational  
5 modifications altered by exposure to X-ray.

6 A) Scatterplot representing the relative protein level difference between irradiated  
7 and non-irradiated samples. Averages of triplicate samples normalized and  
8 transformed to linear values for each condition were subtracted. Each dot  
9 represents a protein that yielded a significant difference after irradiation  
10 (Student's t-test,  $p < 0.05$ ) in cell lysates of HBEC3-KT at day 7 and/or U2OS at  
11 day 5.

12 B) Heat map for proteins involved in cell cycle regulation and homologous  
13 recombination DNA repair pathway. The normalized log<sub>2</sub> values for protein  
14 levels in each sample were median centered for each protein measured.

15

16 **Figure 3:** Irradiated cells have low levels of replication stress and induce FOXM1  
17 expression.

18 A) Frequency distribution plot of replication speed measured by the DNA fiber  
19 assay in HBEC3-KT cells at day 7 following exposure to the indicated X-ray  
20 doses. As a control, HBEC3-KT cells were treated for 48h with 25 $\mu$ M HU to  
21 reduce replication speed. Arrows indicate average speed. Inserts show  
22 examples of replication tracks of different length.

- 1           B) Quantification of the percentage of cells with RPA70 foci detected by  
2           immunofluorescence. Between 50 and 100 cells were scored in replicate  
3           samples of non-irradiated and day 7 irradiated HBEC3-KT cells or day 5  
4           irradiated U2OS cells. Error bars represent standard deviation. Student's t-test.
- 5           C) Boxplots for the relative FOXM1 expression levels detected by reverse phase  
6           protein arrays in HBEC3-KT at day 5 and 7, and in U2OS at day 5 post-  
7           exposure to a 2Gy X-ray dose. Student's t-test.
- 8           D) Western blot for FOXM1 expression and known transcriptional target proteins  
9           in HBEK3-KT at day 7 and in U2OS at day 5 post-exposure to the indicated  
10          X-ray dose.

11

12   **Figure 4:** Interference with FOXM1 transcriptional activity reduces radiation induced  
13   phenotypes.

- 14          A) Western blot analysis of known transcriptional target proteins for FOXM1 in  
15          HBEC3-KT at day 7 following exposure to 2Gy X-ray and transfection at day  
16          3 with 100nM aptamer of random sequence (Control) or of a sequence  
17          interfering with FOXM1 transcriptional activity (Aptamer).
- 18          B) Micronucleus assay in the same cells analyzed in A. Error bars represent  
19          standard deviation. 1 of 2 experiments shown. One Way ANOVA followed by  
20          Bonferroni post-test.
- 21          C) Effect of aptamer transfection on the gene conversion assay to report  
22          homologous recombination dependent repair. Error bars represent SEM.

1 Average of two experiments. One Way ANOVA followed by Bonferroni post-  
2 test.

3

4 **Figure 5:** FOXM1b overexpression is sufficient to induce genomic instability.

5 A) Western blot for Flag-tagged FOXM1 expression and transcriptional target  
6 proteins in stably expressing U2OS cells induced for 48h with the indicated  
7 Doxocyclin concentration.

8 B) Micronucleus formation in HBEC3-KT and U2OS transiently expressing  
9 FOXM1. Empty vector or FOXM1 were transfected 72h prior to the 18h  
10 incubation with cytochalasin. U2OS cells were treated with 1µg/ml Dox. Error  
11 bars represent SEM. Student' t-test.

12 C) Western blot analysis for RPA2 and Chk1 phosphorylation in HBEC3-KT and  
13 U2OS cells overexpressing FOXM1 or treated with HU 25µM for 48h or  
14 3mM for 4h.

15

16 **Figure 6:** FOXM1 expression promotes cell transformation. Triplicate flasks of HBEC3-  
17 KT cells were exposed to 4Gy X-ray and transfected at day 4 with the indicated  
18 construct. At day 6 post-irradiation, the cells were passaged and samples were collected  
19 for micronucleus assay shown in (A). After a month of continuous growth, the cells were  
20 tested for growth in soft agar shown in (B). Error bars represent SEM. Student' t-test and  
21 One Way ANOVA with Fisher's LSD post-test for aptamer and radiation samples.

22

23

1 **Supplementary Figures:**

2 **Supplementary Figure 1:** Detail of the constructs engineered in U2OS cells to report  
3 the repair of a double strand break introduced by cleavage with the endonuclease I-SceI.  
4 GFP expression is gained when repair occurs by the specific mechanism.

5

6 **Supplementary Figure 2:** Heat Map of the relative expression of all the antigens  
7 profiled by the reverse phase protein array after hierarchical clustering. Triplicate  
8 samples of non-irradiated (NI) or 2Gy irradiated HBEC3-KT cell lysates collected at day  
9 5 or day 7. Heat map represents “rank-ordered” changes induced by each treatment,  
10 calculated by summing median-centered normalized protein amount.

11

12 **Supplementary Figure 3:** Characterization of radiation induced replication stress.

13 A) Asymmetry of replication track: the graph depicts the ratio of CldU/IdU track  
14 length for each dose. No statistical divergence following One Way ANOVA  
15 analysis.

16 B) Micronucleus formation rates in HBEC3-KT or U2OS cells were irradiated or  
17 treated for 48h with 25 $\mu$ M HU with or without 30 $\mu$ M nucleosides. Error bars are  
18 SEM. Student’ t-test. 1 of 2 experiments.

19

20 **Supplementary Figure 4:** Correlation of FOXM1 expression with transcriptional targets  
21 and replication stress marker levels in cancer cell lines samples analyzed with the RPPA  
22 platform:

1 A) Relative FOXM1 expression across datasets of cell lines grouped by cancer type  
2 extracted from the MD Anderson Cell Lines Project Portal.

3 <https://tcpaportal.org/mclp/#/>

4 B) Table listing the correlation factor and significance of paired comparison of the  
5 indicated protein with FOXM1 expression in each dataset of cell lines grouped by  
6 cancer types. Included are the comparisons that were significant ( $p \leq 0.05$ ).

7 **Supplementary Figure 5:** Correlation of FOXM1 expression with transcriptional targets  
8 and replication stress marker levels in tumor samples analyzed with the RPPA platform:

9 A) Relative FOXM1 expression across datasets of tumor samples grouped by cancer  
10 type extracted from the The Cancer Proteome Atlas. <https://tcpaportal.org/tcpa/>

11 B) Table listing the correlation factor and significance of paired comparison of the  
12 indicated protein with FOXM1 expression in each dataset of tumor samples  
13 grouped by cancer types. Included are the comparisons that were significant ( $p \leq$   
14 0.05)

15

16

17

18

19

20

21

22

23

1 **BIBLIOGRAPHY:**

- 2 1. Delaney GP, Barton MB. Evidence-based estimates of the demand for  
3 radiotherapy. *Clin Oncol (R Coll Radiol)*. 2015;27(2):70-6.
- 4 2. Suit H, Goldberg S, Niemierko A, Ancukiewicz M, Hall E, Goitein M, et al.  
5 Secondary carcinogenesis in patients treated with radiation: a review of data on  
6 radiation-induced cancers in human, non-human primate, canine and rodent  
7 subjects. *Radiat Res*. 2007;167(1):12-42.
- 8 3. Berrington de Gonzalez A, Curtis RE, Kry SF, Gilbert E, Lamart S, Berg CD, et  
9 al. Proportion of second cancers attributable to radiotherapy treatment in adults: a  
10 cohort study in the US SEER cancer registries. *Lancet Oncol*. 2011;12(4):353-60.
- 11 4. Sherborne AL, Davidson PR, Yu K, Nakamura AO, Rashid M, Nakamura JL.  
12 Mutational Analysis of Ionizing Radiation Induced Neoplasms. *Cell Rep*.  
13 2015;12(11):1915-26.
- 14 5. Lee CL, Mowery YM, Daniel AR, Zhang D, Sibley AB, Delaney JR, et al.  
15 Mutational landscape in genetically engineered, carcinogen-induced, and radiation-  
16 induced mouse sarcoma. *JCI Insight*. 2019;4(13).
- 17 6. Little JB. Radiation carcinogenesis. *Carcinogenesis*. 2000;21(3):397-404.
- 18 7. Frankenberg-Schwager M. Induction, repair and biological relevance of  
19 radiation-induced DNA lesions in eukaryotic cells. *Radiat Environ Biophys*.  
20 1990;29(4):273-92.
- 21 8. Jackson SP, Bartek J. The DNA-damage response in human biology and  
22 disease. *Nature*. 2009;461(7267):1071-8.

- 1 9. Morgan WF. Non-targeted and delayed effects of exposure to ionizing  
2 radiation: II. Radiation-induced genomic instability and bystander effects in vivo,  
3 clastogenic factors and transgenerational effects. *Radiat Res.* 2003;159(5):581-96.
- 4 10. Kadhim M, Salomaa S, Wright E, Hildebrandt G, Belyakov OV, Prise KM, et al.  
5 Non-targeted effects of ionising radiation--implications for low dose risk. *Mutat Res.*  
6 2013;752(2):84-98.
- 7 11. Morgan WF, Day JP, Kaplan MI, McGhee EM, Limoli CL. Genomic instability  
8 induced by ionizing radiation. *Radiat Res.* 1996;146(3):247-58.
- 9 12. Ullrich RL, Ponnaiya B. Radiation-induced instability and its relation to  
10 radiation carcinogenesis. *Int J Radiat Biol.* 1998;74(6):747-54.
- 11 13. Kim GJ, Chandrasekaran K, Morgan WF. Mitochondrial dysfunction,  
12 persistently elevated levels of reactive oxygen species and radiation-induced  
13 genomic instability: a review. *Mutagenesis.* 2006;21(6):361-7.
- 14 14. Baulch JE, Aypar U, Waters KM, Yang AJ, Morgan WF. Genetic and epigenetic  
15 changes in chromosomally stable and unstable progeny of irradiated cells. *PLoS One.*  
16 2014;9(9):e107722.
- 17 15. Yu Y, Okayasu R, Weil MM, Silver A, McCarthy M, Zabriskie R, et al. Elevated  
18 breast cancer risk in irradiated BALB/c mice associates with unique functional  
19 polymorphism of the Prkdc (DNA-dependent protein kinase catalytic subunit) gene.  
20 *Cancer Res.* 2001;61(5):1820-4.
- 21 16. Ramirez RD, Sheridan S, Girard L, Sato M, Kim Y, Pollack J, et al.  
22 Immortalization of human bronchial epithelial cells in the absence of viral  
23 oncoproteins. *Cancer Res.* 2004;64(24):9027-34.

- 1 17. Delgado O, Kaisani AA, Spinola M, Xie XJ, Batten KG, Minna JD, et al.  
2 Multipotent capacity of immortalized human bronchial epithelial cells. *PLoS One*.  
3 2011;6(7):e22023.
- 4 18. Sato M, Larsen JE, Lee W, Sun H, Shames DS, Dalvi MP, et al. Human lung  
5 epithelial cells progressed to malignancy through specific oncogenic manipulations.  
6 *Mol Cancer Res*. 2013;11(6):638-50.
- 7 19. Ron E. Cancer risks from medical radiation. *Health Phys*. 2003;85(1):47-59.
- 8 20. Kumar S. Second malignant neoplasms following radiotherapy. *Int J Environ*  
9 *Res Public Health*. 2012;9(12):4744-59.
- 10 21. Werner E, Wang H, Doetsch PW. Opposite roles for p38MAPK-driven  
11 responses and reactive oxygen species in the persistence and resolution of  
12 radiation-induced genomic instability. *PLoS One*. 2014;9(10):e108234.
- 13 22. Werner E, Wang Y, Doetsch PW. A Single Exposure to Low- or High-LET  
14 Radiation Induces Persistent Genomic Damage in Mouse Epithelial Cells In Vitro and  
15 in Lung Tissue. *Radiat Res*. 2017;188(4):373-80.
- 16 23. Werner E, Wang H, Doetsch PW. Role of Pro-inflammatory Cytokines in  
17 Radiation-Induced Genomic Instability in Human Bronchial Epithelial Cells. *Radiat*  
18 *Res*. 2015;184(6):621-9.
- 19 24. Fenech M. Cytokinesis-block micronucleus cytome assay. *Nat Protoc*.  
20 2007;2(5):1084-104.
- 21 25. Lukas C, Savic V, Bekker-Jensen S, Doil C, Neumann B, Pedersen RS, et al.  
22 53BP1 nuclear bodies form around DNA lesions generated by mitotic transmission  
23 of chromosomes under replication stress. *Nat Cell Biol*. 2011;13(3):243-53.



- 1 26. Fernandez-Casanas M, Chan KL. The Unresolved Problem of DNA Bridging.  
2 Genes (Basel). 2018;9(12).
- 3 27. Chan YW, Fugger K, West SC. Unresolved recombination intermediates lead  
4 to ultra-fine anaphase bridges, chromosome breaks and aberrations. Nat Cell Biol.  
5 2018;20(1):92-103.
- 6 28. Bennardo N, Cheng A, Huang N, Stark JM. Alternative-NHEJ is a  
7 mechanistically distinct pathway of mammalian chromosome break repair. PLoS  
8 Genet. 2008;4(6):e1000110.
- 9 29. Allen CP, Hirakawa H, Nakajima NI, Moore S, Nie J, Sharma N, et al. Low- and  
10 High-LET Ionizing Radiation Induces Delayed Homologous Recombination that  
11 Persists for Two Weeks before Resolving. Radiat Res. 2017;188(1):82-93.
- 12 30. Monteiro LJ, Khongkow P, Kongsema M, Morris JR, Man C, Weekes D, et al.  
13 The Forkhead Box M1 protein regulates BRIP1 expression and DNA damage repair  
14 in epirubicin treatment. Oncogene. 2013;32(39):4634-45.
- 15 31. Khongkow P, Karunarathna U, Khongkow M, Gong C, Gomes AR, Yague E, et  
16 al. FOXM1 targets NBS1 to regulate DNA damage-induced senescence and epirubicin  
17 resistance. Oncogene. 2014;33(32):4144-55.
- 18 32. Nestal de Moraes G, Bella L, Zona S, Burton MJ, Lam EW. Insights into a  
19 Critical Role of the FOXO3a-FOXM1 Axis in DNA Damage Response and Genotoxic  
20 Drug Resistance. Curr Drug Targets. 2016;17(2):164-77.
- 21 33. Techer H, Koundrioukoff S, Azar D, Wilhelm T, Carignon S, Brison O, et al.  
22 Replication dynamics: biases and robustness of DNA fiber analysis. J Mol Biol.  
23 2013;425(23):4845-55.

- 1 34. Koundrioukoff S, Carignon S, Techer H, Letessier A, Brison O, Debatisse M.  
2 Stepwise activation of the ATR signaling pathway upon increasing replication stress  
3 impacts fragile site integrity. *PLoS Genet.* 2013;9(7):e1003643.
- 4 35. Burrell RA, McClelland SE, Endesfelder D, Groth P, Weller MC, Shaikh N, et al.  
5 Replication stress links structural and numerical cancer chromosomal instability.  
6 *Nature.* 2013;494(7438):492-6.
- 7 36. Zhang N, Wu X, Yang L, Xiao F, Zhang H, Zhou A, et al. FoxM1 inhibition  
8 sensitizes resistant glioblastoma cells to temozolomide by downregulating the  
9 expression of DNA-repair gene Rad51. *Clin Cancer Res.* 2012;18(21):5961-71.
- 10 37. Zhou J, Wang Y, Wang Y, Yin X, He Y, Chen L, et al. FOXM1 modulates cisplatin  
11 sensitivity by regulating EXO1 in ovarian cancer. *PLoS One.* 2014;9(5):e96989.
- 12 38. Xiang Q, Tan G, Jiang X, Wu K, Tan W, Tan Y. Suppression of FOXM1  
13 Transcriptional Activities via a Single-Stranded DNA Aptamer Generated by SELEX.  
14 *Sci Rep.* 2017;7:45377.
- 15 39. Laoukili J, Kooistra MR, Bras A, Kauw J, Kerkhoven RM, Morrison A, et al.  
16 FoxM1 is required for execution of the mitotic programme and chromosome  
17 stability. *Nat Cell Biol.* 2005;7(2):126-36.
- 18 40. Tan Y, Raychaudhuri P, Costa RH. Chk2 mediates stabilization of the FoxM1  
19 transcription factor to stimulate expression of DNA repair genes. *Mol Cell Biol.*  
20 2007;27(3):1007-16.
- 21 41. Li J, Lu Y, Akbani R, Ju Z, Roebuck PL, Liu W, et al. TCPA: a resource for cancer  
22 functional proteomics data. *Nat Methods.* 2013;10(11):1046-7.

- 1 42. Li J, Zhao W, Akbani R, Liu W, Ju Z, Ling S, et al. Characterization of Human  
2 Cancer Cell Lines by Reverse-phase Protein Arrays. *Cancer Cell*. 2017;31(2):225-39.
- 3 43. Ding LH, Park S, Xie Y, Girard L, Minna JD, Story MD. Elucidation of changes in  
4 molecular signalling leading to increased cellular transformation in oncogenically  
5 progressed human bronchial epithelial cells exposed to radiations of increasing LET.  
6 *Mutagenesis*. 2015;30(5):685-94.
- 7 44. Vaz M, Hwang SY, Kagiampakis I, Phallen J, Patil A, O'Hagan HM, et al. Chronic  
8 Cigarette Smoke-Induced Epigenomic Changes Precede Sensitization of Bronchial  
9 Epithelial Cells to Single-Step Transformation by KRAS Mutations. *Cancer Cell*.  
10 2017;32(3):360-76 e6.
- 11 45. Sato M, Vaughan MB, Girard L, Peyton M, Lee W, Shames DS, et al. Multiple  
12 oncogenic changes (K-RAS(V12), p53 knockdown, mutant EGFRs, p16 bypass,  
13 telomerase) are not sufficient to confer a full malignant phenotype on human  
14 bronchial epithelial cells. *Cancer Res*. 2006;66(4):2116-28.
- 15 46. Gaillard H, Garcia-Muse T, Aguilera A. Replication stress and cancer. *Nat Rev*  
16 *Cancer*. 2015;15(5):276-89.
- 17 47. Ait Saada A, Lambert SAE, Carr AM. Preserving replication fork integrity and  
18 competence via the homologous recombination pathway. *DNA Repair (Amst)*.  
19 2018;71:135-47.
- 20 48. Durkin SG, Glover TW. Chromosome fragile sites. *Annu Rev Genet*.  
21 2007;41:169-92.

- 1 49. Chan KL, Palmai-Pallag T, Ying S, Hickson ID. Replication stress induces  
2 sister-chromatid bridging at fragile site loci in mitosis. *Nat Cell Biol.*  
3 2009;11(6):753-60.
- 4 50. Aguilera A, Garcia-Muse T. Causes of genome instability. *Annu Rev Genet.*  
5 2013;47:1-32.
- 6 51. Sonoda E, Sasaki MS, Morrison C, Yamaguchi-Iwai Y, Takata M, Takeda S.  
7 Sister chromatid exchanges are mediated by homologous recombination in  
8 vertebrate cells. *Mol Cell Biol.* 1999;19(7):5166-9.
- 9 52. Nagasawa H, Wilson PF, Chen DJ, Thompson LH, Bedford JS, Little JB. Low  
10 doses of alpha particles do not induce sister chromatid exchanges in bystander  
11 Chinese hamster cells defective in homologous recombination. *DNA Repair (Amst).*  
12 2008;7(3):515-22.
- 13 53. Gelot C, Magdalou I, Lopez BS. Replication stress in Mammalian cells and its  
14 consequences for mitosis. *Genes (Basel).* 2015;6(2):267-98.
- 15 54. Wilhelm T, Ragu S, Magdalou I, Machon C, Dardillac E, Techer H, et al. Slow  
16 Replication Fork Velocity of Homologous Recombination-Defective Cells Results  
17 from Endogenous Oxidative Stress. *PLoS Genet.* 2016;12(5):e1006007.
- 18 55. Somyajit K, Gupta R, Sedlackova H, Neelsen KJ, Ochs F, Rask MB, et al. Redox-  
19 sensitive alteration of replisome architecture safeguards genome integrity. *Science.*  
20 2017;358(6364):797-802.
- 21 56. Carter SL, Eklund AC, Kohane IS, Harris LN, Szallasi Z. A signature of  
22 chromosomal instability inferred from gene expression profiles predicts clinical  
23 outcome in multiple human cancers. *Nat Genet.* 2006;38(9):1043-8.

- 1 57. Barger CJ, Branick C, Chee L, Karpf AR. Pan-Cancer Analyses Reveal Genomic  
2 Features of FOXM1 Overexpression in Cancer. *Cancers (Basel)*. 2019;11(2).
- 3 58. Marechal A, Zou L. DNA damage sensing by the ATM and ATR kinases. *Cold  
4 Spring Harb Perspect Biol*. 2013;5(9).
- 5 59. Nam EA, Cortez D. ATR signalling: more than meeting at the fork. *Biochem J*.  
6 2011;436(3):527-36.
- 7 60. Wilhelm T, Magdalou I, Barascu A, Techer H, Debatisse M, Lopez BS.  
8 Spontaneous slow replication fork progression elicits mitosis alterations in  
9 homologous recombination-deficient mammalian cells. *Proc Natl Acad Sci U S A*.  
10 2014;111(2):763-8.
- 11 61. Teh MT, Gemenetzidis E, Chaplin T, Young BD, Philpott MP. Upregulation of  
12 FOXM1 induces genomic instability in human epidermal keratinocytes. *Mol Cancer*.  
13 2010;9:45.
- 14 62. Arlt MF, Wilson TE, Glover TW. Replication stress and mechanisms of CNV  
15 formation. *Curr Opin Genet Dev*. 2012;22(3):204-10.
- 16 63. Mazzu YZ, Armenia J, Chakraborty G, Yoshikawa Y, Coggins SA, Nandakumar  
17 S, et al. A Novel Mechanism Driving Poor-Prognosis Prostate Cancer: Overexpression  
18 of the DNA Repair Gene, Ribonucleotide Reductase Small Subunit M2 (RRM2). *Clin  
19 Cancer Res*. 2019;25(14):4480-92.
- 20 64. Park YY, Jung SY, Jennings NB, Rodriguez-Aguayo C, Peng G, Lee SR, et al.  
21 FOXM1 mediates Dox resistance in breast cancer by enhancing DNA repair.  
22 *Carcinogenesis*. 2012;33(10):1843-53.

- 1 65. Vispe S, Cazaux C, Lesca C, Defais M. Overexpression of Rad51 protein  
2 stimulates homologous recombination and increases resistance of mammalian cells  
3 to ionizing radiation. *Nucleic Acids Res.* 1998;26(12):2859-64.
- 4 66. Arnaudeau C, Helleday T, Jenssen D. The RAD51 protein supports  
5 homologous recombination by an exchange mechanism in mammalian cells. *J Mol*  
6 *Biol.* 1999;289(5):1231-8.
- 7 67. Richardson C, Stark JM, Ommundsen M, Jasin M. Rad51 overexpression  
8 promotes alternative double-strand break repair pathways and genome instability.  
9 *Oncogene.* 2004;23(2):546-53.
- 10 68. Tomimatsu N, Mukherjee B, Catherine Hardebeck M, Ilcheva M, Vanessa  
11 Camacho C, Louise Harris J, et al. Phosphorylation of EXO1 by CDKs 1 and 2  
12 regulates DNA end resection and repair pathway choice. *Nat Commun.* 2014;5:3561.
- 13 69. Wang IC, Zhang Y, Snyder J, Sutherland MJ, Burhans MS, Shannon JM, et al.  
14 Increased expression of FoxM1 transcription factor in respiratory epithelium  
15 inhibits lung sacculation and causes Clara cell hyperplasia. *Dev Biol.*  
16 2010;347(2):301-14.
- 17 70. Kalinina OA, Kalinin SA, Polack EW, Mikaelian I, Panda S, Costa RH, et al.  
18 Sustained hepatic expression of FoxM1B in transgenic mice has minimal effects on  
19 hepatocellular carcinoma development but increases cell proliferation rates in  
20 preneoplastic and early neoplastic lesions. *Oncogene.* 2003;22(40):6266-76.
- 21 71. Kalin TV, Ustiyanyan V, Kalinichenko VV. Multiple faces of FoxM1 transcription  
22 factor: lessons from transgenic mouse models. *Cell Cycle.* 2011;10(3):396-405.

- 1 72. Wang Z, Park HJ, Carr JR, Chen YJ, Zheng Y, Li J, et al. FoxM1 in tumorigenicity  
2 of the neuroblastoma cells and renewal of the neural progenitors. *Cancer Res.*  
3 2011;71(12):4292-302.
- 4 73. Gu C, Yang Y, Sompallae R, Xu H, Tompkins VS, Holman C, et al. FOXM1 is a  
5 therapeutic target for high-risk multiple myeloma. *Leukemia.* 2016;30(4):873-82.
- 6 74. Bartkova J, Horejsi Z, Koed K, Kramer A, Tort F, Zieger K, et al. DNA damage  
7 response as a candidate anti-cancer barrier in early human tumorigenesis. *Nature.*  
8 2005;434(7035):864-70.
- 9 75. Gorgoulis VG, Vassiliou LV, Karakaidos P, Zacharatos P, Kotsinas A, Liloglou  
10 T, et al. Activation of the DNA damage checkpoint and genomic instability in human  
11 precancerous lesions. *Nature.* 2005;434(7035):907-13.
- 12 76. Bartkova J, Rezaei N, Liontos M, Karakaidos P, Kletsas D, Issaeva N, et al.  
13 Oncogene-induced senescence is part of the tumorigenesis barrier imposed by DNA  
14 damage checkpoints. *Nature.* 2006;444(7119):633-7.
- 15 77. Molinuevo R, Freije A, de Pedro I, Stoll SW, Elder JT, Gandarillas A. FOXM1  
16 allows human keratinocytes to bypass the oncogene-induced differentiation  
17 checkpoint in response to gain of MYC or loss of p53. *Oncogene.* 2017;36(7):956-65.
- 18 78. Smirnov A, Panatta E, Lena A, Castiglia D, Di Daniele N, Melino G, et al. FOXM1  
19 regulates proliferation, senescence and oxidative stress in keratinocytes and cancer  
20 cells. *Aging (Albany NY).* 2016;8(7):1384-97.
- 21 79. Li Z, Hudson FZ, Wang H, Wang Y, Bian Z, Murnane JP, et al. Increased  
22 mutagenic joining of enzymatically-induced DNA double-strand breaks in high-  
23 charge and energy particle irradiated human cells. *Radiat Res.* 2013;180(1):17-24.

- 1 80. Jackson DA, Pombo A. Replicon clusters are stable units of chromosome  
2 structure: evidence that nuclear organization contributes to the efficient activation  
3 and propagation of S phase in human cells. *J Cell Biol.* 1998;140(6):1285-95.
- 4 81. Daigaku Y, Davies AA, Ulrich HD. Ubiquitin-dependent DNA damage bypass is  
5 separable from genome replication. *Nature.* 2010;465(7300):951-5.
- 6 82. Hamburger AW, White CP, Dunn FE, Citron ML, Hummel S. Modulation of  
7 human tumor colony growth in soft agar by serum. *Int J Cell Cloning.* 1983;1(4):216-  
8 29.
- 9



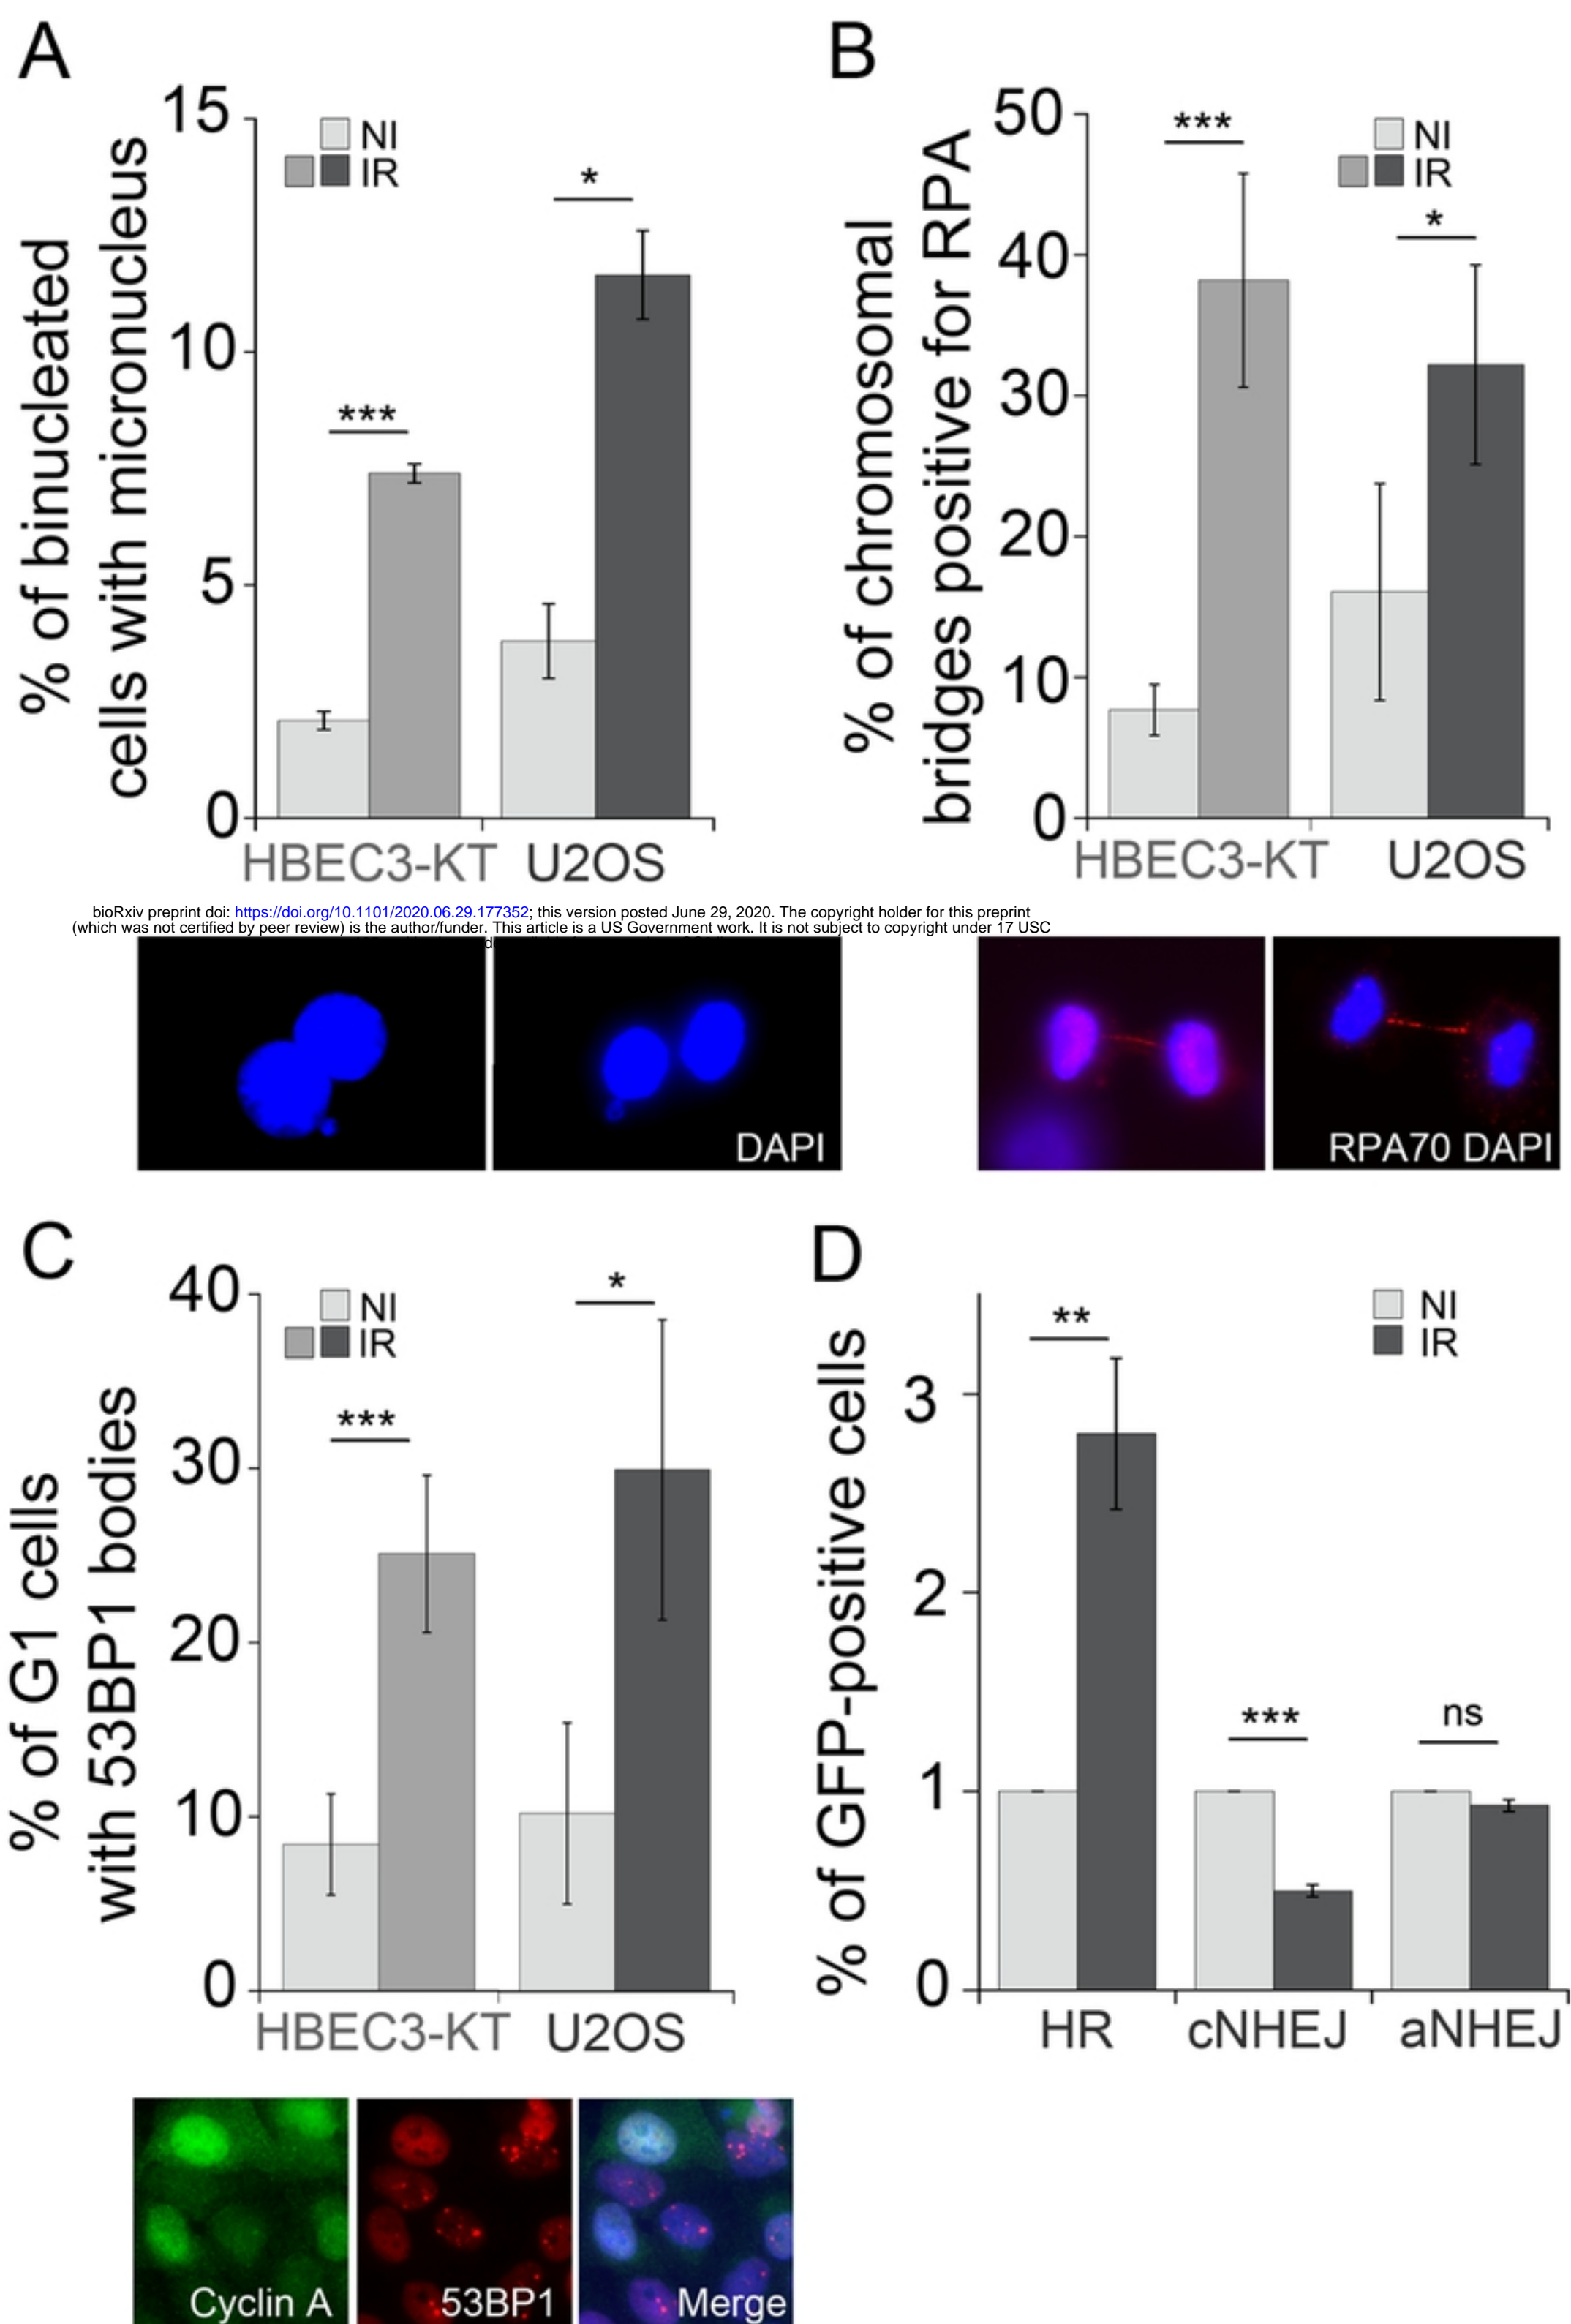

Figure 1

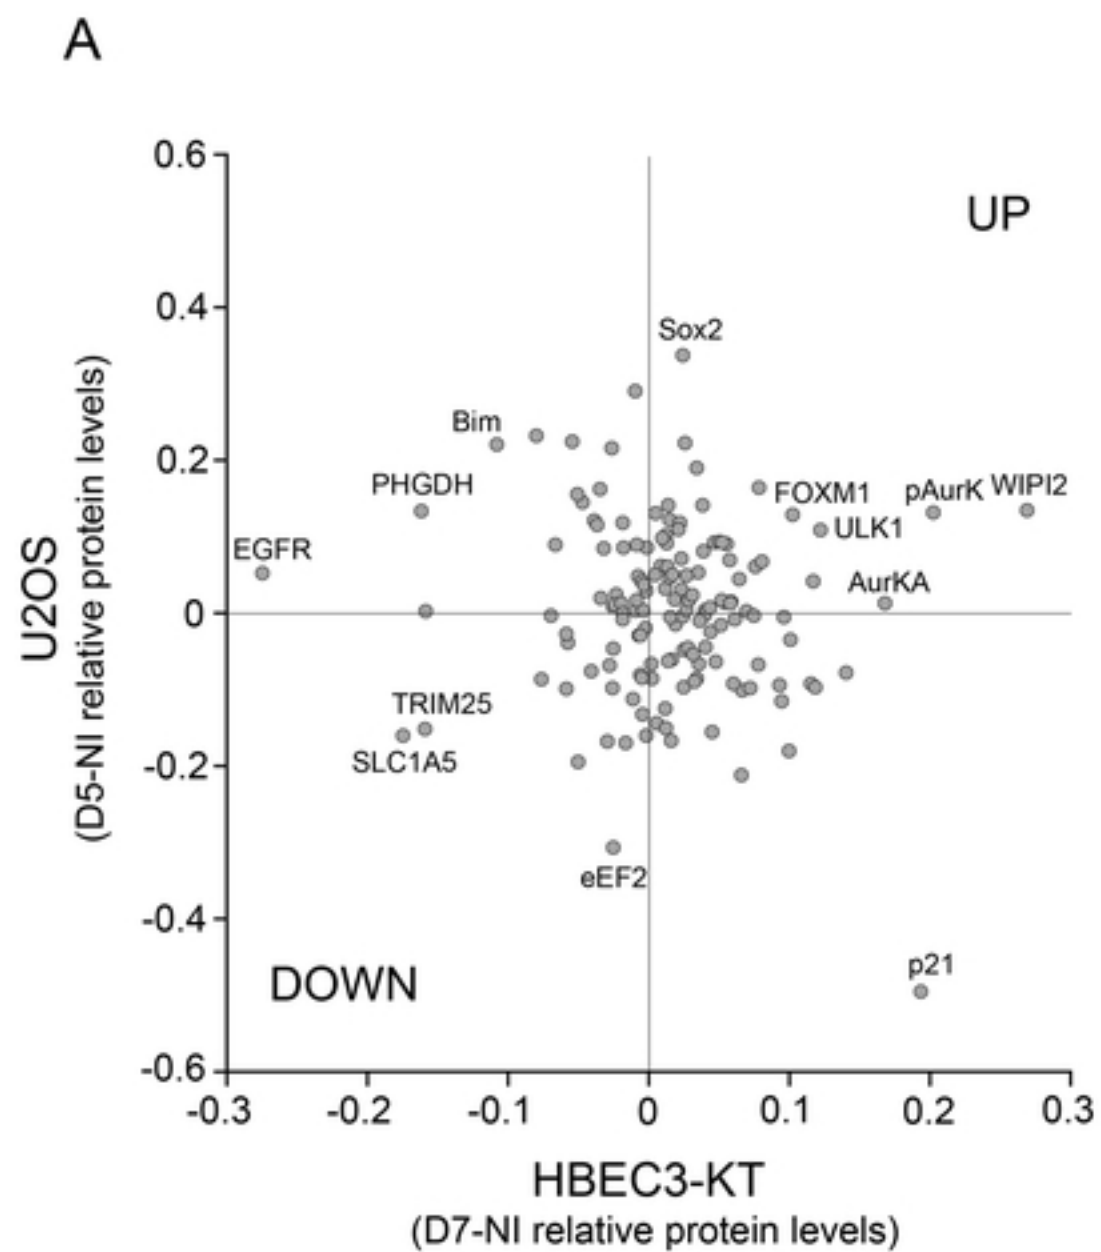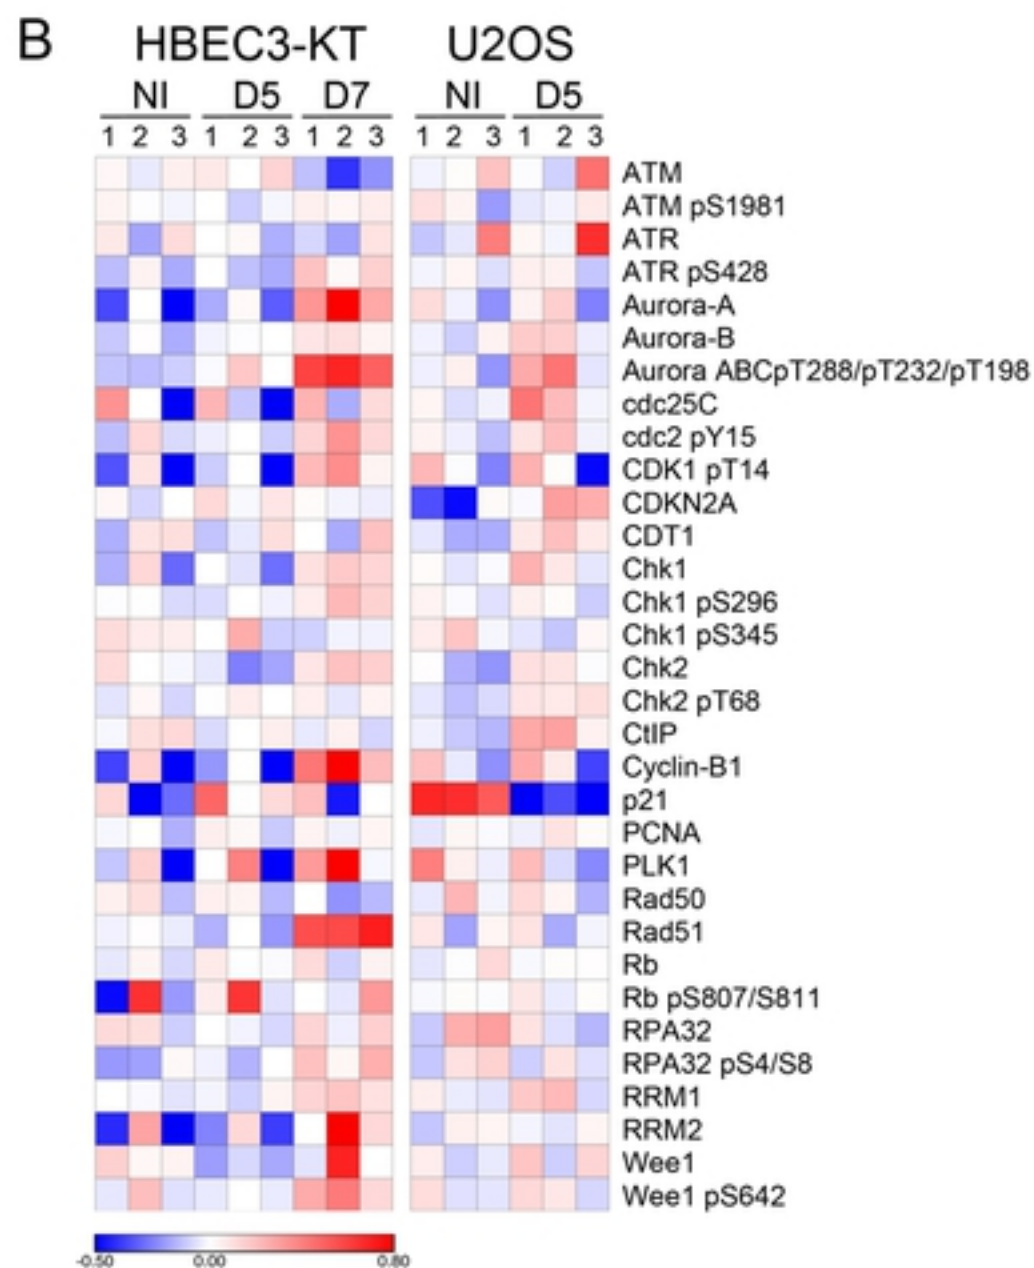

Figure 2

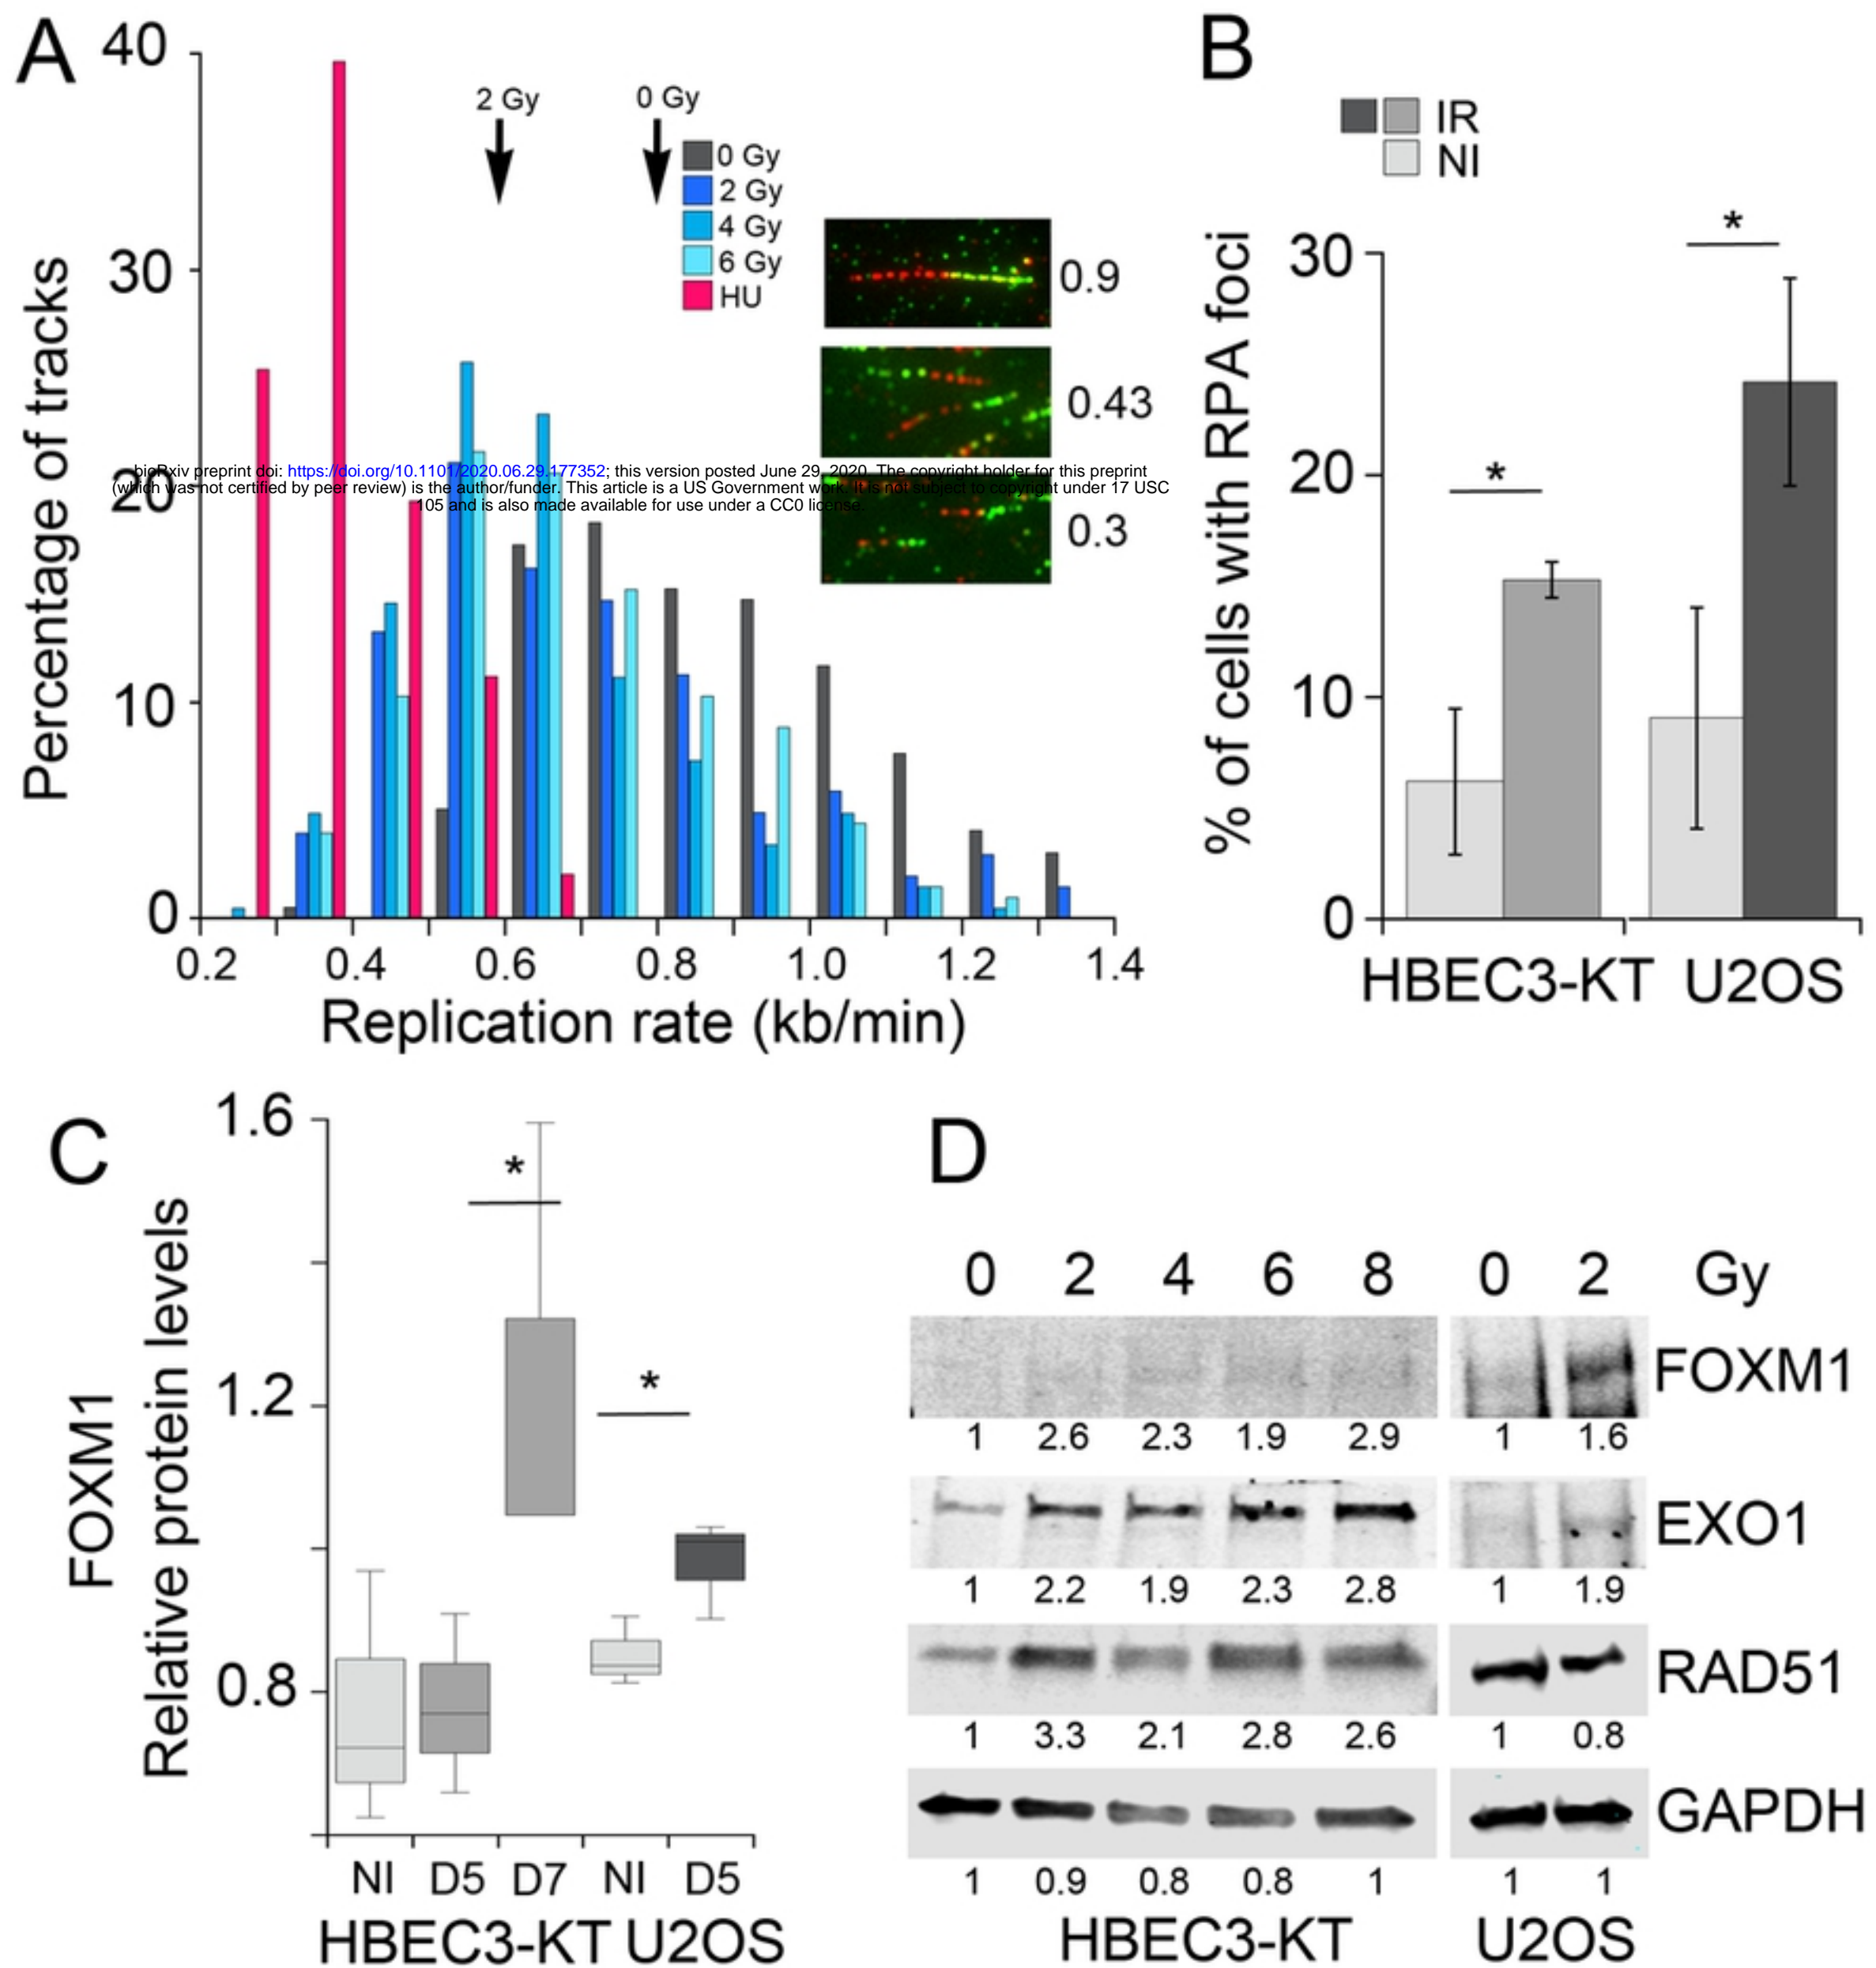

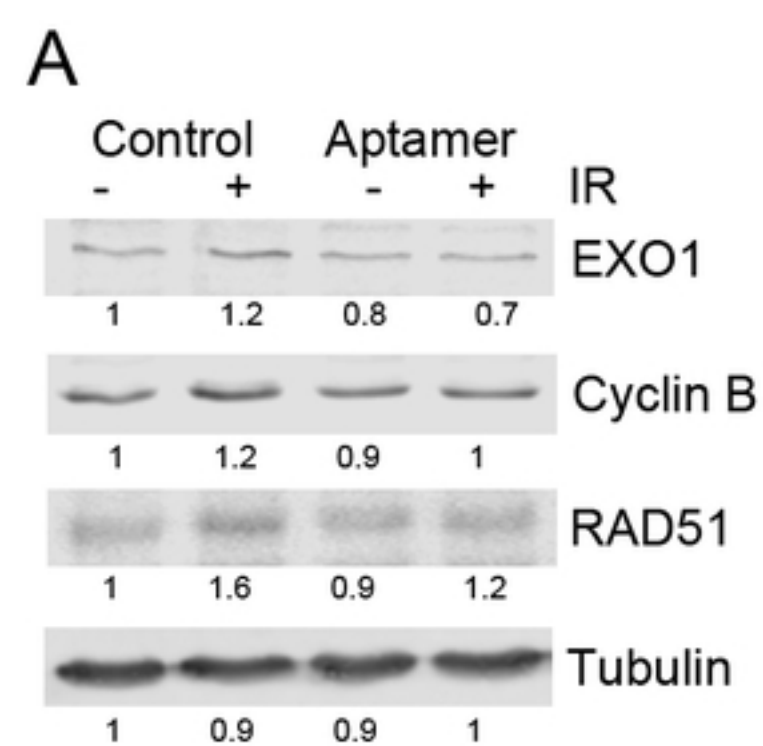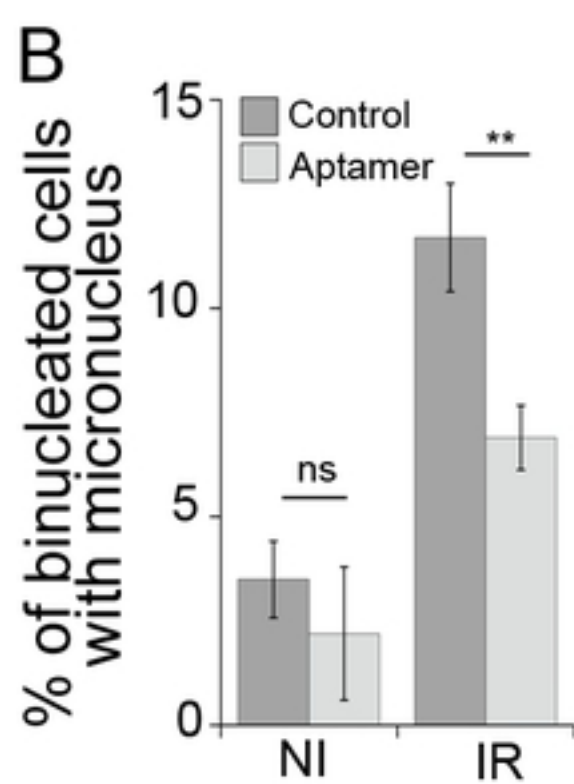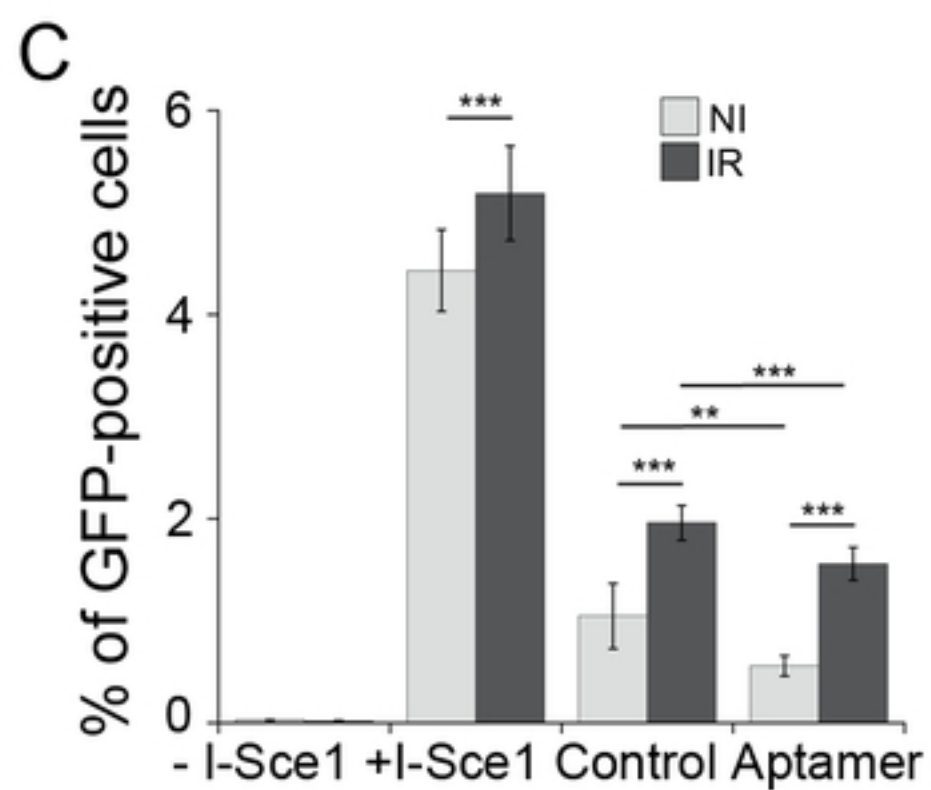

Figure 4



**A**

bioRxiv preprint doi: <https://doi.org/10.1101/2020.06.29.177352>; this version posted June 29, 2020. The copyright holder for this preprint (which was not certified by peer review) is the author/funder. This article is a US Government work. It is not subject to copyright under 17 USC 105 and is also made available for use under a CC0 license.

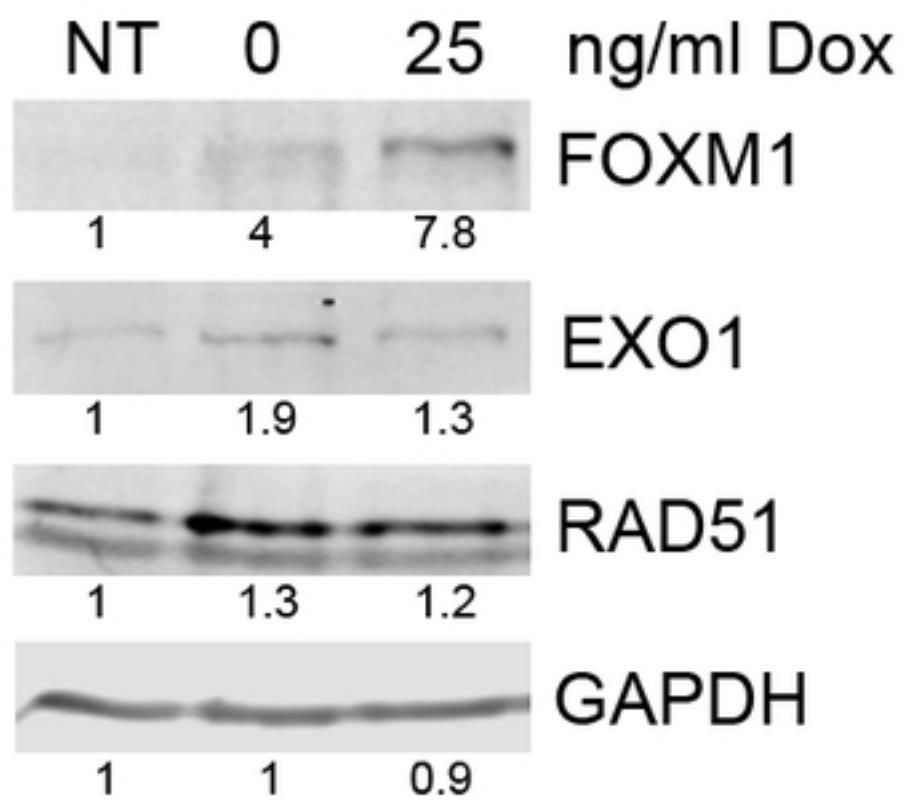**B**

% of binucleated cells with micronucleus

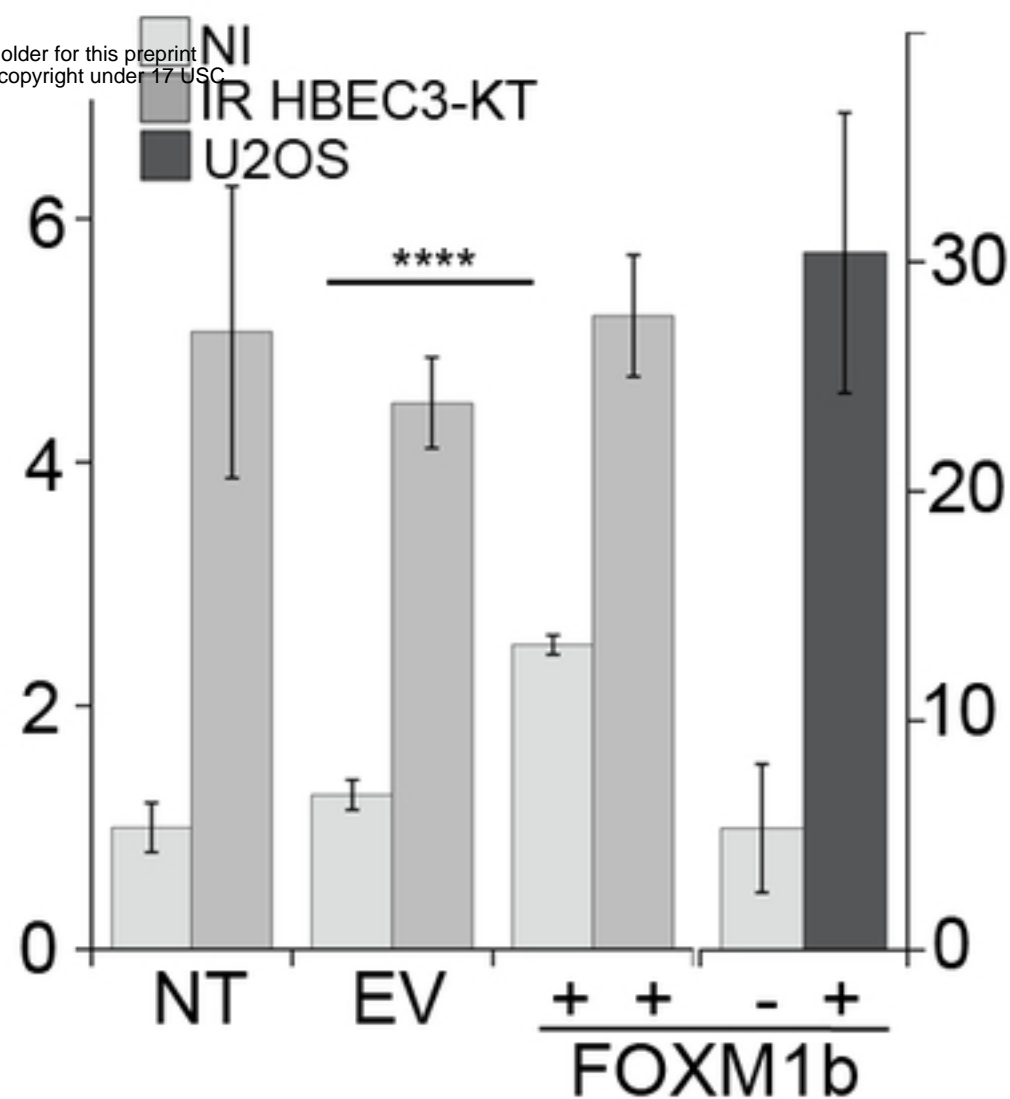**C**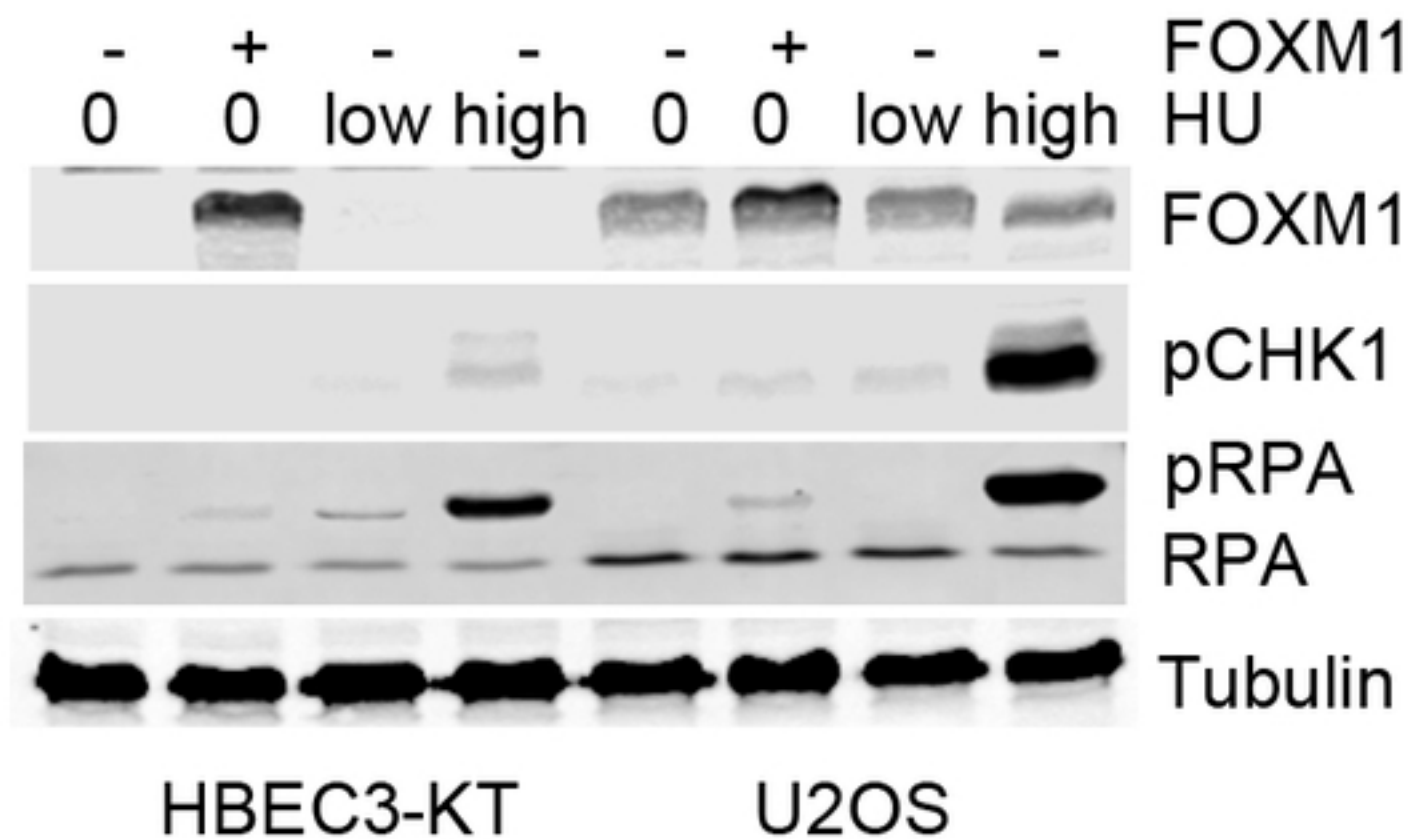

Figure 5

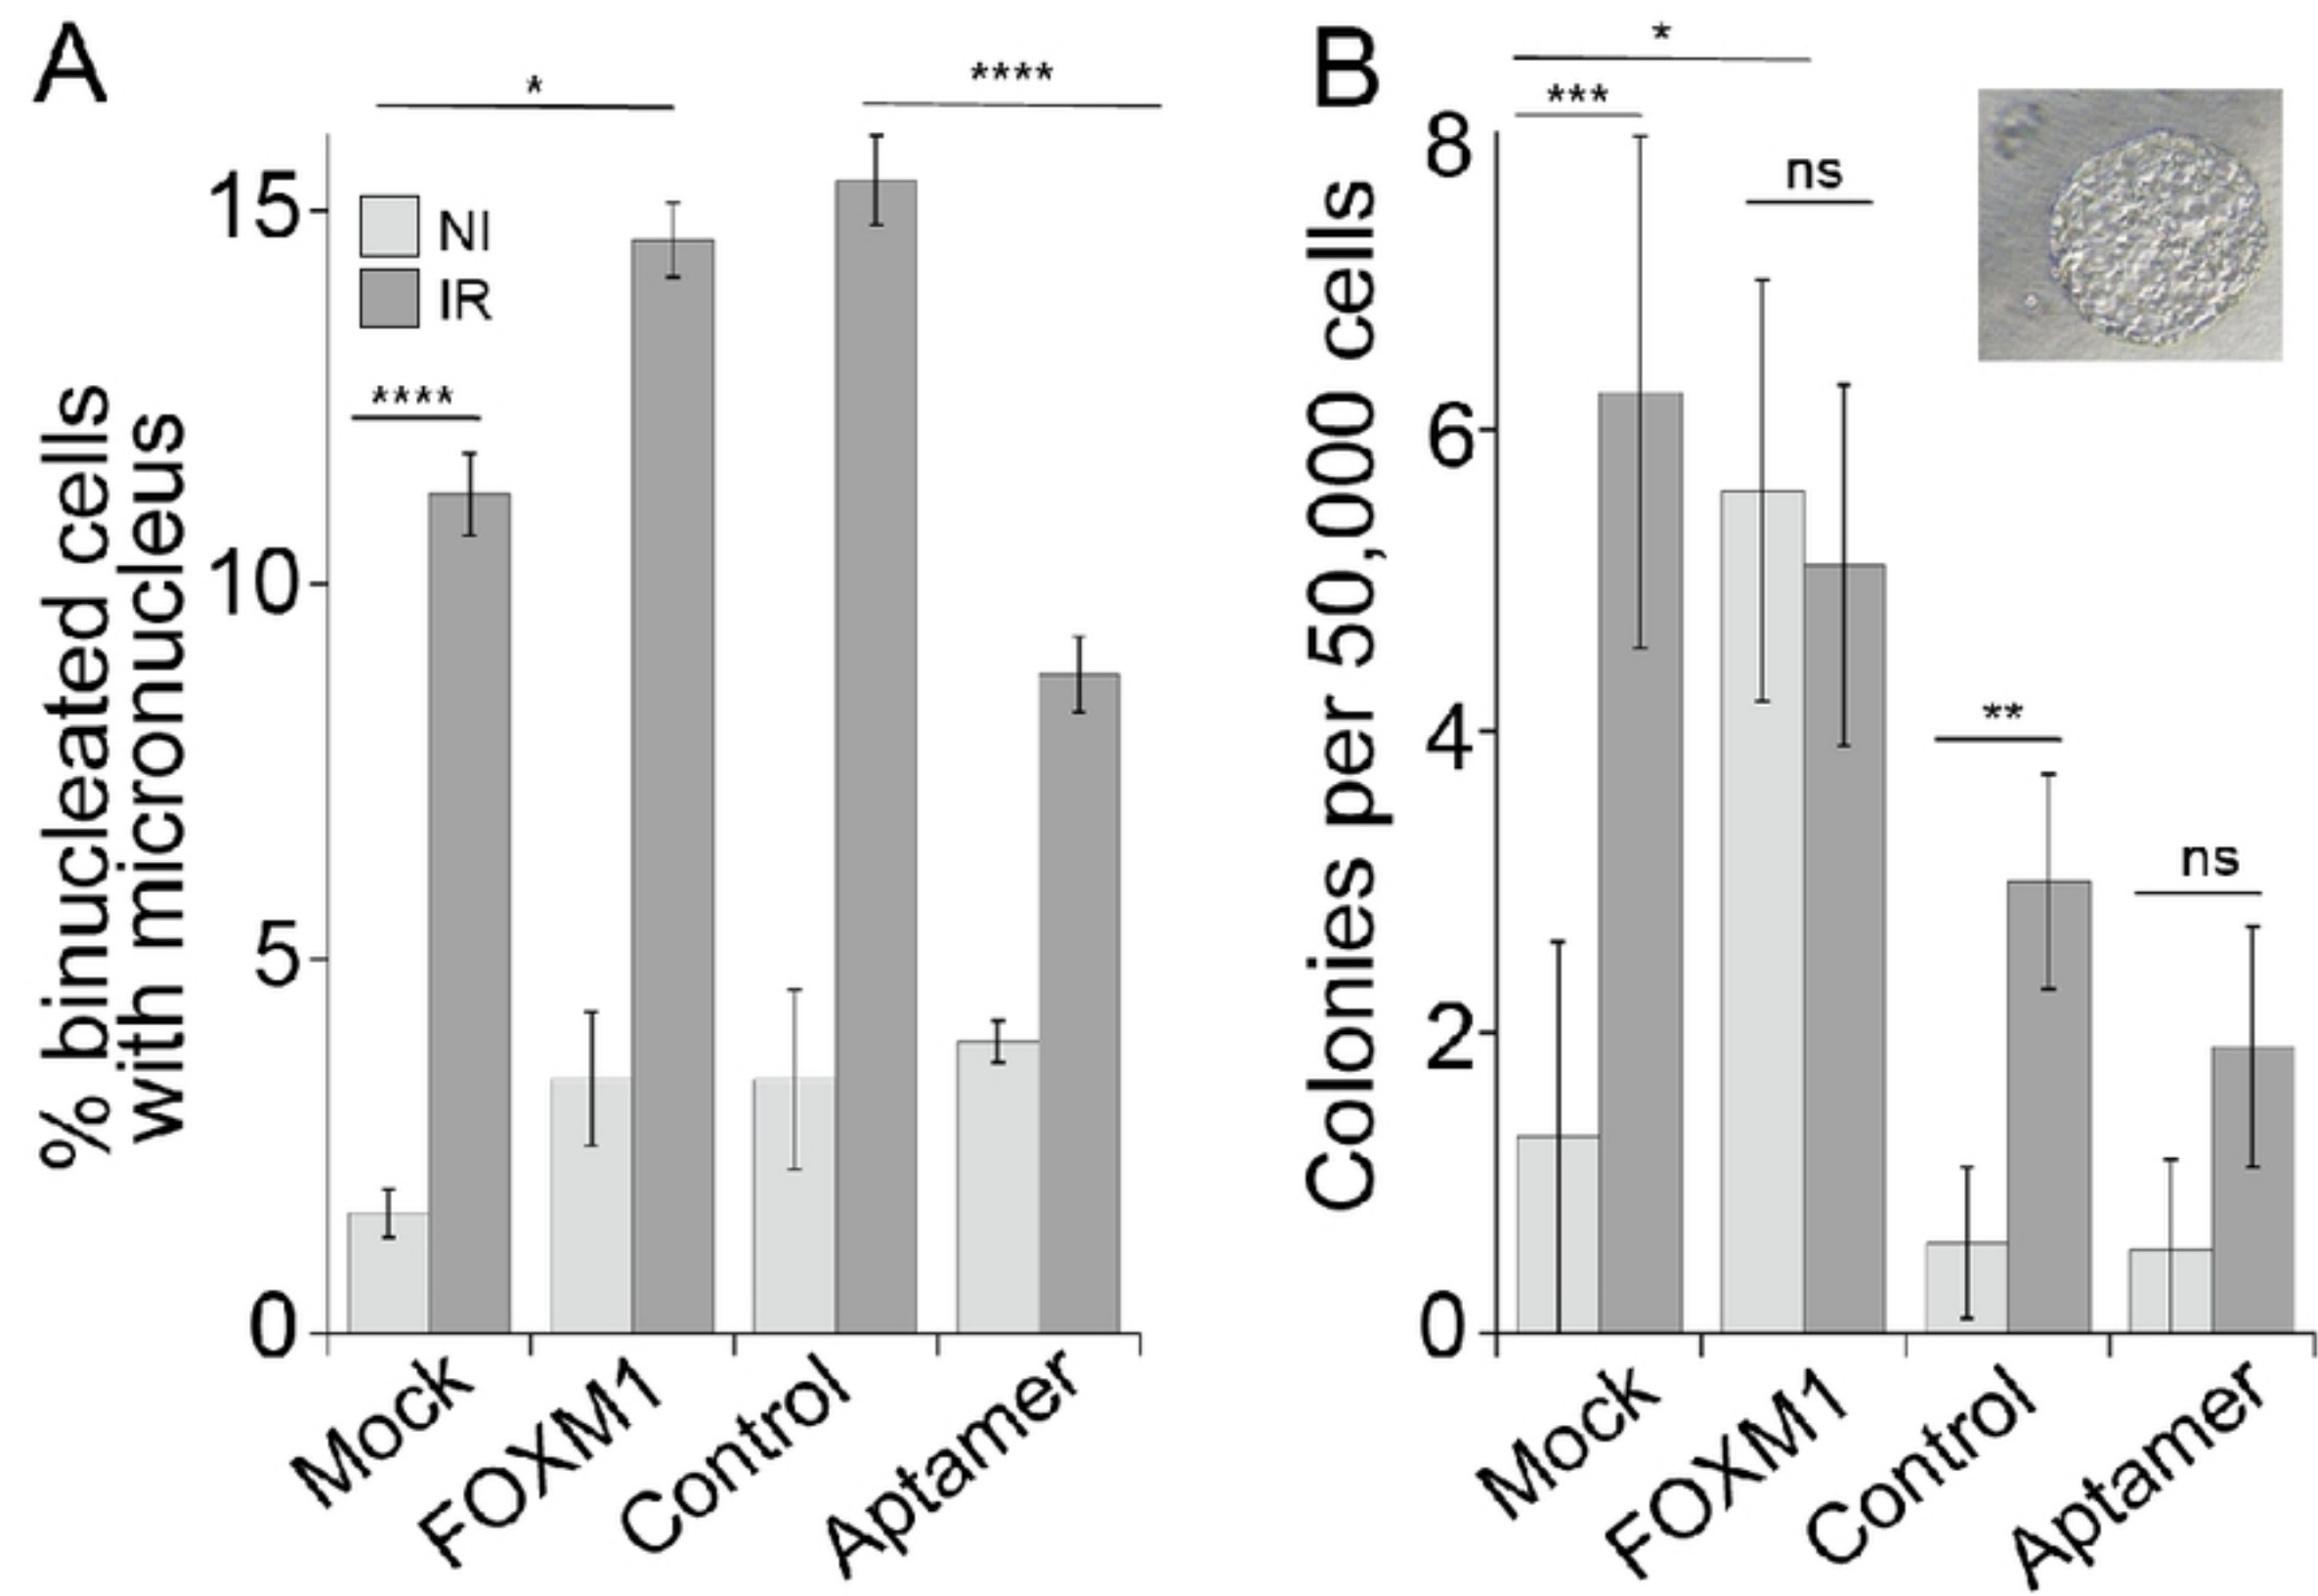

Source: https://www.biorxiv.org/content/10.1101/2020.06.29.177352v1.full.pdf
